# Supplementary material for: Bull Sperm SWATH-MS-Based Proteomics Reveals Link between High Fertility and Energy Production, Motility Structures, and Sperm–Oocyte Interaction
Source: PubMed Central journal article supplement (PMC10629479; doi:10.1021/acs.jproteome.3c00461), 2023-10-02
Supplement: pr3c00461_si_001.pdf [file pr3c00461_si_001.pdf]

# Bull sperm SWATH-MS-based proteomics reveals link between high fertility and energy production, motility structures, and sperm-oocyte interaction

*Sabrina Gacem<sup>1,2</sup>, María Castello-Ruiz<sup>1,3\*</sup>, Carlos O. Hidalgo<sup>4</sup>, Carolina Tamargo<sup>4</sup>, Pilar Santolaria<sup>5</sup>, Carles Soler<sup>1</sup>, Jesús L. Yániz<sup>5</sup>, Miguel A. Silvestre<sup>1</sup>*

<sup>1</sup>Departamento de Biología Celular, Biología Funcional y Antropología Física, Universitat de València, 46100 Valencia, Spain. E-mail: maria.castello@uv.es

<sup>2</sup>Departamento de Medicina y Cirugía Animal. Universitat Autònoma de Barcelona, 08193 Barcelona, Spain.

<sup>3</sup>Unidad Mixta de Investigación Cerebrovascular, Instituto de Investigación Sanitaria La Fe, Hospital Universitario y Politécnico La Fe, 46026 Valencia, Spain.

<sup>4</sup>Animal Selection and Reproduction Area, Regional Agrifood Research and Development Service (SERIDA), 33394 Deva, Gijón, Spain.

<sup>5</sup>BIOFITER Research Group, Institute of Environmental Sciences (IUCA), University of Zaragoza, 22071 Huesca, Spain.

**Table of contents:**

Supplementary Table S1: Full list of the 802 identified proteins after the proteomic analysis by SWATH LC/MS-MS, of the sperm samples of high (H) and low (L) fertility bulls.

**Supplementary Table S1. Full list of proteins identified in high fertility(H) and low fertility(L) group**

| N  | Accession  | Protein names                                                         | Gene Names     | Length | Mass   | Peptides (95%) | HF (Mean of                   | LF (Mean of                   | FC (HF/LF) | p-value    |
|----|------------|-----------------------------------------------------------------------|----------------|--------|--------|----------------|-------------------------------|-------------------------------|------------|------------|
|    |            |                                                                       |                |        |        |                | normalised<br>abundant value) | normalised abundant<br>value) |            |            |
| 1  | A0A3Q1LNB4 | Dynein axonemal heavy chain 10                                        | DNAH10         | 4573   | 525861 | 10             | 194692,0603                   | 192846,6674                   | 0,99052148 | 0,83840432 |
| 2  | A0A3Q1LPJ9 | ADAM metallopeptidase domain 20                                       |                | 730    | 82420  | 16             | 120174,5158                   | 157435,2421                   | 1,31005514 | 0,21532793 |
| 3  | A0A3Q1LQR2 | Tubulin alpha chain                                                   | LOC112443216   | 449    | 49845  | 68             | 151797,6075                   | 96154,01664                   | 0,63343565 | 0,03939215 |
| 4  | A0A3Q1LUM9 | methylcrotonoyl-CoA carboxylase (EC 6.4.1.4) (3-methylcrotonyl-CoA c  | MCCC2          | 562    | 61254  | 2              | 25850,14032                   | 22740,28254                   | 0,87969668 | 0,72945253 |
| 5  | A0A3Q1LYJ4 | Histone H2A                                                           | H2AL3          | 117    | 13368  | 9              | 105581,5496                   | 127251,3469                   | 1,20524227 | 0,34725896 |
| 6  | A0A3Q1M0U9 | Transitional endoplasmic reticulum ATPase (EC 3.6.4.6) (15S Mg(2+)-AT | VCP            | 796    | 88783  | 12             | 355080,94                     | 337719,9432                   | 0,95110693 | 0,84787307 |
| 7  | A0A3Q1M2V9 | Transmembrane protein 11                                              | TMEM11         | 202    | 22684  | 3              | 513884,9341                   | 554165,0259                   | 1,07838348 | 0,73364007 |
| 8  | A0A3Q1M7D1 | Dynein axonemal heavy chain 12                                        | DNAH12         | 3962   | 454302 | 12             | 105841,0148                   | 140610,9674                   | 1,32851114 | 0,29508943 |
| 9  | A0A3Q1MA90 | Transmembrane protein 190                                             | TMEM190        | 258    | 28311  | 11             | 14443578,12                   | 14149079,69                   | 0,97961042 | 0,85005547 |
| 10 | A0A3Q1MGG8 | IQ motif containing N                                                 |                | 3540   | 363545 | 187            | 8956856,327                   | 9578028,251                   | 1,06935156 | 0,5886157  |
| 11 | A0A3Q1MNG4 | BRCA2 and CDKN1A-interacting protein                                  | BCCIP          | 306    | 35193  | 1              | 190927,7607                   | 230892,9014                   | 1,20932074 | 0,78235026 |
| 12 | A0A3Q1MNP8 | Dynein light chain roadblock-type 2                                   | DYNLRB2        | 174    | 19545  | 2              | 295375,9517                   | 244554,6704                   | 0,82794374 | 0,24833699 |
| 13 | A0A3Q1MNS9 | Theg spermatid protein like                                           | THEGL          | 450    | 50856  | 2              | 113408,577                    | 125166,1097                   | 1,10367411 | 0,52375927 |
| 14 | A0A3Q1N631 | Angel homolog 2                                                       | ANGEL2         | 522    | 59738  | 1              | 14202,38251                   | 23302,85447                   | 1,6407708  | 0,85231388 |
| 15 | A0A3Q1ND36 | Disintegrin and metalloproteinase domain-containing protein 1a-like   |                | 822    | 91364  | 1              | 23197,96986                   | 36902,61354                   | 1,5907691  | 0,05138509 |
| 16 | A0A3S5ZPN7 | Coiled-coil domain containing 116                                     | CCDC116        | 669    | 74149  | 2              | 112539,1753                   | 116065,2175                   | 1,03133169 | 0,93646602 |
| 17 | A0A452DI02 | palmitoyl-protein hydrolase (EC 3.1.2.22)                             | LYPLA1         | 219    | 23575  | 3              | 379220,5772                   | 324505,1606                   | 0,85571612 | 0,3953731  |
| 18 | A0A4W2BMT5 | Protein interacting with cyclin A1                                    | PROCA1         | 376    | 42242  | 4              | 20545,37462                   | 35540,75549                   | 1,72986651 | 0,03970366 |
| 19 | A0A4W2BMW7 | IQ domain-containing protein F5                                       | LOC113880958   | 149    | 18051  | 2              | 1844593,614                   | 1447274,813                   | 0,78460361 | 0,09316436 |
| 20 | A0A4W2BP90 | Jagunal homolog 1                                                     | JAGN1          | 183    | 21102  | 2              | 28301,38327                   | 32254,29972                   | 1,1396722  | 0,76019132 |
| 21 | A0A4W2BQ23 | Lysozyme like 4                                                       | LYZL4          | 145    | 16293  | 11             | 1019948,095                   | 285717,4277                   | 0,28012938 | 0,22799159 |
| 22 | A0A4W2BRF2 | Mitochondrial import inner membrane translocase subunit Tim21         |                | 244    | 27962  | 1              | 29293,69356                   | 35472,77158                   | 1,21093544 | 0,44504667 |
| 23 | A0A4W2BT41 | Epididymal-specific lipocalin-5-like                                  | LOC113901868   | 180    | 19569  | 2              | 45345,22378                   | 43830,44882                   | 0,96659461 | 0,73833285 |
| 24 | A0A4W2BT96 | ATP synthase subunit alpha                                            |                | 588    | 63130  | 91             | 150891,8748                   | 159547,6884                   | 1,05736435 | 0,94927689 |
| 25 | A0A4W2BTQ2 | Kinesin-like protein                                                  |                | 854    | 97297  | 2              | 38097,45857                   | 41641,25112                   | 1,09301913 | 0,61050377 |
| 26 | A0A4W2BU14 | Glycerophosphodiester phosphodiesterase 1                             | GDE1           | 331    | 37653  | 3              | 363375,3975                   | 320038,174                    | 0,88073705 | 0,38080066 |
| 27 | A0A4W2BU38 | Ubiquinol-cytochrome c reductase, Rieske iron-sulfur polypeptide 1    |                | 464    | 50631  | 9              | 1202846,588                   | 1381509,514                   | 1,14853343 | 0,30236773 |
| 28 | A0A4W2BUW4 | VAMP associated protein A                                             | VAPA           | 294    | 32454  | 14             | 459024,4646                   | 395318,0706                   | 0,86121351 | 0,22652698 |
| 29 | A0A4W2BV22 | Septin 4                                                              | SEPTIN4        | 477    | 54875  | 3              | 107652,6233                   | 120045,6686                   | 1,1151207  | 0,47326006 |
| 30 | A0A4W2BVV1 | Adenylate kinase 8 (EC 2.7.4.6)                                       | AK8            | 498    | 56728  | 10             | 782458,9436                   | 711474,6323                   | 0,90928047 | 0,46917062 |
| 31 | A0A4W2BVV5 | Proteasome assembly chaperone 2                                       | PSMG2          | 264    | 29224  | 2              | 27544,48319                   | 30801,28824                   | 1,11823802 | 0,55985748 |
| 32 | A0A4W2BWR0 | Chromosome 26 C10orf82 homolog                                        | C26H10orf82    | 283    | 31820  | 9              | 1015345,614                   | 974138,9647                   | 0,95941614 | 0,69854527 |
| 33 | A0A4W2BWY0 | Voltage dependent anion channel 3                                     | VDAC3          | 283    | 30739  | 64             | 36874664,88                   | 33722329,72                   | 0,91451217 | 0,49103722 |
| 34 | A0A4W2BZ57 | carnitine O-palmitoyltransferase (EC 2.3.1.21)                        | CPT1B          | 771    | 88512  | 21             | 764237,0068                   | 649673,1115                   | 0,85009376 | 0,38312569 |
| 35 | A0A4W2BZV4 | Radial spoke head component 9                                         | RSPH9          | 276    | 31294  | 12             | 1203752,476                   | 971998,4725                   | 0,80747371 | 0,26548157 |
| 36 | A0A4W2COV1 | Cytochrome c1, heme protein, mitochondrial                            | LOC113903907 C | 325    | 35297  | 21             | 1879109,804                   | 1888357,045                   | 1,00492108 | 0,92878547 |
| 37 | A0A4W2COW3 | EF-hand domain containing 1                                           | EFHC1          | 640    | 74004  | 23             | 1157569,748                   | 1217221,778                   | 1,05153213 | 0,64553496 |
| 38 | A0A4W2C225 | WBP2 N-terminal like                                                  |                | 313    | 31966  | 16             | 2249351,318                   | 1918807,638                   | 0,85304933 | 0,73240424 |
| 39 | A0A4W2C4M9 | Aspartate aminotransferase (EC 2.6.1.1)                               | GOT1           | 413    | 46399  | 4              | 23393,0254                    | 24000,39604                   | 1,02596375 | 0,48412093 |
| 40 | A0A4W2CX44 | Dynein axonemal heavy chain 17                                        | DNAH17         | 4462   | 509199 | 81             | 15468,50381                   | 36928,41333                   | 2,38732936 | 0,15840353 |
| 41 | A0A4W2C5D2 | CDGSH iron sulfur domain 1                                            | CISD1          | 106    | 11983  | 3              | 30799,33291                   | 35750,125                     | 1,16074348 | 0,33959932 |
| 42 | A0A4W2C6J1 | Leucine zipper protein 2                                              | LUZP2          | 340    | 38973  | 55             | 2870837,307                   | 4290346,187                   | 1,49445814 | 0,05525953 |
| 43 | A0A4W2C6Q1 | Cytochrome c oxidase subunit (Cytochrome c oxidase polypeptide VIa)   | GATC           | 126    | 14105  | 3              | 63861,8827                    | 70115,46107                   | 1,09792349 | 0,55068599 |

|    |            |                                                                                |                |      |        |     |             |             |            |            |
|----|------------|--------------------------------------------------------------------------------|----------------|------|--------|-----|-------------|-------------|------------|------------|
| 44 | A0A4W2C6R9 | Adenine phosphoribosyltransferase (EC 2.4.2.7)                                 |                | 246  | 26442  | 2   | 10872,15088 | 7964,500094 | 0,73255975 | 0,17110253 |
| 45 | A0A4W2C6V1 | Rh family C glycoprotein                                                       |                | 598  | 65278  | 2   | 81549,85363 | 57083,44221 | 0,69998215 | 0,60034449 |
| 46 | A0A4W2C855 | Patched domain-containing protein 3-like                                       | LOC113906256   | 933  | 103629 | 5   | 43993,0197  | 35827,12673 | 0,81438208 | 0,38827327 |
| 47 | A0A4W2C8I6 | Phosphatidylethanolamine binding protein 1                                     | PEBP1          | 187  | 20986  | 10  | 604980,6978 | 743666,9958 | 1,22924086 | 0,23590128 |
| 48 | A0A4W2CCN9 | Apolipoprotein A1                                                              |                | 207  | 23868  | 1   | 22206,56291 | 6178,013932 | 0,27820667 | 0,05825752 |
| 49 | A0A4W2CDD2 | Glucose-6-phosphate isomerase (EC 5.3.1.9)                                     | GPI            | 565  | 63636  | 14  | 558379,181  | 536164,6279 | 0,96021601 | 0,77756988 |
| 50 | A0A4W2CDK1 | ATP synthase subunit gamma                                                     | ATP5F1C        | 298  | 33072  | 29  | 2836975,745 | 2900464,217 | 1,02237893 | 0,79997007 |
| 51 | A0A4W2CE44 | Heat shock protein family B (small) member 9                                   | HSPB9          | 157  | 16784  | 15  | 2209747,385 | 3052646,599 | 1,38144596 | 0,01892325 |
| 52 | A0A4W2CEF3 | Glyceraldehyde-3-phosphate dehydrogenase (EC 1.2.1.12)                         | GAPDHS         | 403  | 44104  | 141 | 30449684,32 | 30853859,08 | 1,01327353 | 0,89711401 |
| 53 | A0A4W2CF85 | Calpain small subunit 1                                                        | CAPNS1         | 263  | 27931  | 1   | 45701,93566 | 31494,88635 | 0,68913681 | 0,33806485 |
| 54 | A0A4W2CG68 | Leucine-rich repeat-containing protein 51                                      | LRRC51         | 192  | 22107  | 3   | 83886,53294 | 69266,21633 | 0,82571319 | 0,29301438 |
| 55 | A0A4W2CHI3 | Cytochrome c oxidase subunit                                                   | LOC113875989 C | 88   | 10533  | 10  | 2748560,14  | 3023183,176 | 1,09991524 | 0,40159222 |
| 56 | A0A4W2CHJ7 | Septin 10                                                                      |                | 487  | 56824  | 4   | 92594,4814  | 92276,40933 | 0,99656489 | 0,51940354 |
| 57 | A0A4W2CIX0 | Fibronectin type-II domain-containing protein                                  |                | 183  | 21292  | 16  | 3515759,178 | 2762301,823 | 0,78569142 | 0,48027816 |
| 58 | A0A4W2CJE1 | Chromosome 1 open reading frame 158                                            |                | 196  | 23234  | 3   | 36177,17122 | 42920,78163 | 1,18640513 | 0,25706278 |
| 59 | A0A4W2CKE1 | Protein FAM24A                                                                 |                | 97   | 10404  | 3   | 72195,38548 | 116359,6055 | 1,6117319  | 0,07177695 |
| 60 | A0A4W2CMS0 | Luteinizing hormone subunit beta                                               | LHB            | 338  | 37441  | 2   | 19973,26764 | 26302,6919  | 1,31689478 | 0,94875182 |
| 61 | A0A4W2CN20 | Beta-galactosidase                                                             |                | 1073 | 120740 | 105 | 451399,7022 | 521211,0824 | 1,15465535 | 0,34718578 |
| 62 | A0A4W2CP64 | Destrin, actin depolymerizing factor                                           | DSTN           | 165  | 18506  | 1   | 81444,82901 | 69478,22753 | 0,85307107 | 0,30449383 |
| 63 | A0A4W2CPA4 | Regulator of G protein signaling 22                                            | RGS22          | 1254 | 145932 | 4   | 20358,03066 | 10231,29626 | 0,50256807 | 0,0127063  |
| 64 | A0A4W2CPR2 | ATP-dependent RNA helicase (EC 3.6.4.13)                                       | EIF4A1         | 406  | 46154  | 2   | 54834,99772 | 37482,21221 | 0,68354543 | 0,11342291 |
| 65 | A0A4W2CQX1 | ATP-dependent (S)-NAD(P)H-hydrate dehydratase (EC 4.2.1.93) (ATP-dε NAXD CARKD |                | 345  | 36103  | 2   | 72060,17544 | 95015,83611 | 1,31856238 | 0,26141578 |
| 66 | A0A4W2CR59 | Proteasome subunit beta                                                        | PSMB6          | 239  | 25542  | 5   | 275791,0295 | 293435,4339 | 1,06397744 | 0,68444659 |
| 67 | A0A4W2CS05 | Calmodulin binding transcription activator 1                                   | VAMP3          | 148  | 15514  | 2   | 108658,2341 | 74728,71835 | 0,68774096 | 0,02070081 |
| 68 | A0A4W2CSR1 | Cytochrome c oxidase subunit 6C (Cytochrome c oxidase polypeptide V            | LOC113904380   | 74   | 8610   | 6   | 3945733,482 | 4867329,714 | 1,23356779 | 0,19341668 |
| 69 | A0A4W2CTQ1 | Aspartate aminotransferase (EC 2.6.1.1)                                        | GOT2           | 454  | 50363  | 14  | 1309778,824 | 1532269,902 | 1,1698692  | 0,33385086 |
| 70 | A0A4W2CUA3 | GTP:AMP phosphotransferase AK3, mitochondrial (EC 2.7.4.10) (Adenyl)AK3        |                | 227  | 25671  | 6   | 403509,9898 | 368017,4509 | 0,91204049 | 0,66376366 |
| 71 | A0A4W2CUP5 | Ubiquitin C                                                                    |                | 1146 | 128851 | 10  | 708039,4799 | 749645,3084 | 1,05876202 | 0,84508719 |
| 72 | A0A4W2CVV1 | Mannose-6-phosphate isomerase (EC 5.3.1.8)                                     | MPI            | 423  | 46369  | 4   | 107602,9481 | 74567,67416 | 0,69298914 | 0,10632406 |
| 73 | A0A4W2CWK5 | ATP synthase F1 subunit epsilon                                                | ATP5F1E        | 51   | 5783   | 3   | 318044,1468 | 347229,5673 | 1,09176531 | 0,71954839 |
| 74 | A0A4W2CXU5 | Casein kinase 2 alpha 1                                                        | CSNK2A1        | 391  | 45144  | 11  | 317792,6939 | 291587,0362 | 0,91753851 | 0,48483908 |
| 75 | A0A4W2CYV7 | NADH dehydrogenase [ubiquinone] 1 alpha subcomplex subunit 7 (Con              | NDUFA7         | 113  | 12677  | 2   | 31632,92403 | 32053,0567  | 1,0132815  | 0,88276605 |
| 76 | A0A4W2CZ27 | Coiled-coil-helix-coiled-coil-helix domain containing 3                        | CHCHD3         | 232  | 26685  | 2   | 7415,163966 | 7045,449834 | 0,9501408  | 0,69747708 |
| 77 | A0A4W2CZJ1 | LY6/PLAUR domain containing 4                                                  | LYPD4          | 246  | 26824  | 3   | 23959,90937 | 27341,9631  | 1,1411547  | 0,88600106 |
| 78 | A0A4W2D0C7 | Protein kinase cAMP-dependent type I regulatory subunit alpha                  | PRKAR1A        | 380  | 42893  | 11  | 1153274,879 | 1052575,461 | 0,91268394 | 0,46984422 |
| 79 | A0A4W2D0I6 | Sperm acrosome associated 1                                                    | SPACA1         | 297  | 32850  | 26  | 9485702,249 | 11826240,23 | 1,24674377 | 0,1972812  |
| 80 | A0A4W2D0I8 | H1.7 linker histone                                                            |                | 265  | 29159  | 4   | 180320,7268 | 164660,7121 | 0,91315466 | 0,55390463 |
| 81 | A0A4W2D126 | Superoxide dismutase [Mn], mitochondrial (EC 1.15.1.1)                         |                | 556  | 59294  | 13  | 428865,3838 | 469579,0688 | 1,09493348 | 0,56854577 |
| 82 | A0A4W2D1Z5 | Uncharacterized protein                                                        |                | 5914 | 656236 | 54  | 685039,4432 | 843610,8704 | 1,23147781 | 0,07873497 |
| 83 | A0A4W2D277 | Clusterin                                                                      | CLU            | 439  | 51114  | 21  | 1668596,459 | 1498460,419 | 0,89803644 | 0,93437932 |
| 84 | A0A4W2D2C2 | NADH-ubiquinone oxidoreductase 75 kDa subunit, mitochondrial                   |                | 875  | 96701  | 23  | 2426379,88  | 2355671,163 | 0,97085835 | 0,75996641 |
| 85 | A0A4W2D2D8 | Transmembrane protein 38B                                                      | TMEM38B        | 291  | 32451  | 12  | 1253101,137 | 892235,6861 | 0,71202209 | 0,08219288 |
| 86 | A0A4W2D3D4 | Calmodulin 1                                                                   | CALM1          | 365  | 38625  | 17  | 160814,7587 | 157588,1584 | 0,97993592 | 0,68147063 |
| 87 | A0A4W2D4I1 | Calcium/calmodulin dependent protein kinase IV                                 | CAMK4          | 463  | 49902  | 3   | 80204,50585 | 64151,8111  | 0,79985296 | 0,21584482 |
| 88 | A0A4W2D4S5 | Lon protease homolog, mitochondrial (EC 3.4.21.53) (Lon protease-like          | LONP1          | 1027 | 113918 | 19  | 895786,0842 | 987579,2088 | 1,10247215 | 0,47712212 |
| 89 | A0A4W2D592 | Fibrous sheath interacting protein 2                                           |                | 6744 | 759927 | 129 | 25860,32397 | 23262,17803 | 0,89953158 | 0,38939496 |
| 90 | A0A4W2D5V1 | NADH dehydrogenase [ubiquinone] 1 alpha subcomplex subunit 12                  |                | 220  | 25453  | 5   | 91825,03154 | 79967,13496 | 0,87086423 | 0,36897882 |
| 91 | A0A4W2D8I9 | Tyrosine 3-monooxygenase/tryptophan 5-monooxygenase activation p               | YWHAZ          | 229  | 26085  | 12  | 567080,9906 | 476432,5636 | 0,84014906 | 0,17321    |

|     |            |                                                                                |                |      |        |     |             |             |            |            |
|-----|------------|--------------------------------------------------------------------------------|----------------|------|--------|-----|-------------|-------------|------------|------------|
| 92  | A0A4W2D8B4 | SPATA31/FAM205 domain-containing protein                                       |                | 1254 | 138951 | 9   | 16944,36268 | 14743,3807  | 0,87010535 | 0,63068593 |
| 93  | A0A4W2D8G0 | Sperm equatorial segment protein 1                                             | SPESP1         | 345  | 38997  | 39  | 3295309,693 | 3665402,734 | 1,11230903 | 0,37083503 |
| 94  | A0A4W2D8T3 | Albumin                                                                        | ALB            | 655  | 74084  | 202 | 107680,1795 | 107071,301  | 0,99434549 | 0,78465834 |
| 95  | A0A4W2D9A8 | SPATA31 domain-containing protein                                              |                | 1523 | 173961 | 23  | 613352,8116 | 627870,7659 | 1,02366983 | 0,83647606 |
| 96  | A0A4W2D9T4 | Testis expressed 46                                                            | TEX46          | 162  | 18816  | 1   | 29856,53323 | 27965,14948 | 0,93665093 | 0,87545885 |
| 97  | A0A4W2DBJ7 | dTMP kinase (EC 2.7.4.9)                                                       | DTYMK          | 228  | 25491  | 1   | 39513,53977 | 22033,93264 | 0,55762994 | 0,3956885  |
| 98  | A0A4W2DDE0 | Ring finger protein 130                                                        | RNF130         | 462  | 50538  | 1   | 22721,82022 | 18401,56201 | 0,80986302 | 0,86691145 |
| 99  | A0A4W2DER0 | High mobility group box 4                                                      | HMGB4          | 247  | 28855  | 4   | 88810,30471 | 68621,2677  | 0,77267236 | 0,47640913 |
| 100 | A0A4W2DFR9 | Ferritin                                                                       |                | 157  | 17860  | 13  | 2947661,038 | 1807247,907 | 0,61311253 | 0,0293047  |
| 101 | A0A4W2DHN1 | Medium-chain specific acyl-CoA dehydrogenase, mitochondrial (EC 1.3.ACADM      |                | 421  | 46573  | 31  | 1744468,02  | 1798520,454 | 1,03098505 | 0,76533629 |
| 102 | A0A4W2DIS9 | Keratin 75                                                                     |                | 561  | 60110  | 9   | 219149,2508 | 497049,7945 | 2,26808804 | 0,10508249 |
| 103 | A0A4W2DLZ3 | Actin-like protein 7A                                                          | ACTL7A         | 438  | 49016  | 43  | 2912881,789 | 2576964,631 | 0,88467875 | 0,58560457 |
| 104 | A0A4W2DMG8 | Heat shock protein 90 beta family member 1                                     |                | 808  | 92862  | 3   | 479689,7459 | 293152,6127 | 0,61112962 | 0,05812982 |
| 105 | A0A4W2DNN5 | Isoaspartyl peptidase/L-asparaginase (EC 3.4.19.5) (EC 3.5.1.1) (AsparaξASRGL1 |                | 308  | 32050  | 27  | 5161743,766 | 4912512,61  | 0,95171571 | 0,84594272 |
| 106 | A0A4W2DNW3 | Calcium binding tyrosine phosphorylation regulated                             |                | 382  | 41488  | 26  | 119347,4564 | 119347,4564 | 0,96285347 | 0,65808051 |
| 107 | A0A4W2DQ38 | IQ motif containing F1                                                         | IQCF1          | 209  | 24194  | 14  | 179465,2844 | 305592,9067 | 1,70279677 | 0,01094425 |
| 108 | A0A4W2DQI3 | Betaine--homocysteine S-methyltransferase                                      | BHMT           | 538  | 59271  | 2   | 43664,26539 | 53220,29284 | 1,21885236 | 0,0883168  |
| 109 | A0A4W2DRC1 | Spermatid-specific manchette-related protein 1                                 |                | 166  | 19396  | 15  | 215810,0954 | 246110,9497 | 1,14040518 | 0,3668477  |
| 110 | A0A4W2DS83 | Nucleoside diphosphate kinase (EC 2.7.4.6)                                     | LOC113883266 C | 187  | 20457  | 3   | 21433,92549 | 23376,01531 | 1,09060822 | 0,57315398 |
| 111 | A0A4W2DSH2 | NADH dehydrogenase [ubiquinone] 1 alpha subcomplex subunit 10, mi              | NDUFA10        | 343  | 39278  | 11  | 795760,0369 | 750085,6821 | 0,94260285 | 0,66064907 |
| 112 | A0A4W2DSL6 | Arylsulfatase A                                                                | ARSA           | 507  | 53807  | 8   | 220749,4335 | 317620,085  | 1,43882627 | 0,56855863 |
| 113 | A0A4W2DTA2 | Solute carrier family 25 member 22                                             | SLC25A22       | 322  | 34531  | 3   | 82207,37531 | 79992,14995 | 0,9730532  | 0,93031206 |
| 114 | A0A4W2DTM9 | Phosphoglycerate kinase (EC 2.7.2.3)                                           |                | 417  | 44781  | 40  | 2724992,298 | 3352040,982 | 1,23011026 | 0,10411154 |
| 115 | A0A4W2DTV6 | S-formylglutathione hydrolase (EC 3.1.2.12)                                    | ESD            | 282  | 31548  | 1   | 70555,36033 | 70609,40594 | 1,000766   | 0,79236596 |
| 116 | A0A4W2DXT9 | Secretoglobin family 1D member                                                 |                | 123  | 13632  | 2   | 18066,07296 | 19471,26491 | 1,07778071 | 0,7859356  |
| 117 | A0A4W2DVI7 | NADPH:adrenodoxin oxidoreductase, mitochondrial (EC 1.18.1.6)                  |                | 463  | 50858  | 2   | 78882,32541 | 58119,76302 | 0,73679069 | 0,19711189 |
| 118 | A0A4W2DW14 | Multifunctional fusion protein [Includes: Delta-1-pyrroline-5-carboxylat       | ALDH4A1        | 563  | 61495  | 10  | 538002,3306 | 592436,8853 | 1,10117903 | 0,42045459 |
| 119 | A0A4W2DY45 | Protein kinase cAMP-dependent type II regulatory subunit alpha                 | PRKAR2A        | 401  | 45094  | 21  | 2172425,847 | 2425729,122 | 1,11659927 | 0,43526268 |
| 120 | A0A4W2DYA7 | Triosephosphate isomerase (EC 5.3.1.1)                                         | TPI1           | 286  | 30577  | 55  | 12430003,37 | 13249309,53 | 1,06591359 | 0,58195526 |
| 121 | A0A4W2DYH1 | Isocitrate dehydrogenase [NADP] (EC 1.1.1.42)                                  | IDH2           | 477  | 53617  | 17  | 961735,3932 | 947857,3149 | 0,98556975 | 0,88732908 |
| 122 | A0A4W2DYQ2 | Actin beta                                                                     | ACTB           | 375  | 41737  | 23  | 1401964,33  | 1313284,949 | 0,93674634 | 0,76418434 |
| 123 | A0A4W2DZI5 | EF-hand calcium binding domain 6                                               | EFCAB6         | 1497 | 172742 | 41  | 2001979,445 | 2024115,548 | 1,01105711 | 0,94182945 |
| 124 | A0A4W2E067 | Serine/threonine-protein phosphatase (EC 3.1.3.16)                             | PPP1CC         | 337  | 38548  | 35  | 341034,076  | 403449,6923 | 1,18301871 | 0,34076398 |
| 125 | A0A4W2E1I7 | T-complex 11                                                                   |                | 473  | 52661  | 3   | 89097,48533 | 79391,52504 | 0,89106359 | 0,49430019 |
| 126 | A0A4W2E5S0 | folate gamma-glutamyl hydrolase (EC 3.4.19.9)                                  | GGH            | 318  | 35683  | 2   | 2046,407687 | 1829,497966 | 0,89400464 | 0,60384569 |
| 127 | A0A4W2E5V3 | Family with sequence similarity 71 member A                                    |                | 585  | 63860  | 20  | 880889,7026 | 839692,4313 | 0,9532322  | 0,67856612 |
| 128 | A0A4W2E851 | Coiled-coil-helix-coiled-coil-helix domain containing 6                        | CHCHD6         | 337  | 37062  | 2   | 43237,56941 | 32683,29394 | 0,75590035 | 0,40445542 |
| 129 | A0A4W2E8C9 | Peroxiredoxin like 2B                                                          | PRXL2B         | 210  | 23526  | 1   | 17043,29008 | 20076,9275  | 1,177996   | 0,72981612 |
| 130 | A0A4W2E975 | Cilia and flagella associated protein 20                                       | CFAP20         | 193  | 22748  | 13  | 1638721,232 | 1578344,677 | 0,9631563  | 0,71579975 |
| 131 | A0A4W2E9B9 | Tubulin beta chain                                                             | TUBB4B         | 445  | 49831  | 199 | 1063312,211 | 2123557,557 | 1,99711574 | 0,13788829 |
| 132 | A0A4W2E9V4 | ADAM metallopeptidase domain 20                                                |                | 744  | 83691  | 6   | 169933,3537 | 223456,1129 | 1,31496324 | 0,09848086 |
| 133 | A0A4W2EA76 | IF rod domain-containing protein                                               |                | 428  | 47264  | 7   | 23013,94629 | 11909,07432 | 0,51747207 | 0,38681503 |
| 134 | A0A4W2ECX5 | Fibronectin type-II domain-containing protein                                  |                | 356  | 41036  | 13  | 2691094,185 | 2193876,318 | 0,8152358  | 0,62791827 |
| 135 | A0A4W2EDB5 | NADH dehydrogenase [ubiquinone] iron-sulfur protein 6, mitochondria            | NDUFS6         | 124  | 13413  | 6   | 18153,83553 | 19799,02072 | 1,09062466 | 0,55297331 |
| 136 | A0A4W2EE11 | Beta-defensin                                                                  |                | 101  | 11774  | 2   | 16927,61734 | 22757,20231 | 1,34438308 | 0,38457554 |
| 137 | A0A4W2EEF6 | Aconitate hydratase, mitochondrial (Aconitase) (EC 4.2.1.3)                    | ACO2           | 780  | 85359  | 61  | 5086372,569 | 5166379,911 | 1,01572974 | 0,80732622 |
| 138 | A0A4W2EF91 | BPTI/Kunitz inhibitor domain-containing protein                                |                | 138  | 15824  | 3   | 616117,8388 | 412751,6146 | 0,66992317 | 0,01961867 |
| 139 | A0A4W2EHT0 | T-complex protein 1 subunit beta (CCT-beta)                                    | CCT2           | 526  | 56405  | 10  | 225078,9551 | 143580,2316 | 0,63791051 | 0,04155914 |

|     |            |                                                                        |                |      |        |     |             |             |            |            |
|-----|------------|------------------------------------------------------------------------|----------------|------|--------|-----|-------------|-------------|------------|------------|
| 140 | A0A4W2EL77 | ATP synthase subunit beta (EC 7.1.2.2)                                 | ATP5F1B        | 528  | 56284  | 105 | 55095462,73 | 50386248,51 | 0,91452628 | 0,4335244  |
| 141 | A0A4W2ELI9 | Tripeptidyl-peptidase 2 (EC 3.4.14.10)                                 |                | 1297 | 143824 | 3   | 26464,65857 | 66090,96132 | 2,49732908 | 0,09333829 |
| 142 | A0A4W2ELT9 | NADH dehydrogenase [ubiquinone] 1 alpha subcomplex subunit 8 (Con      | NDUFA8         | 278  | 31103  | 7   | 645715,9811 | 556909,3368 | 0,86246795 | 0,24233814 |
| 143 | A0A4W2EMT1 | Coiled-coil domain containing 65                                       | CCDC65         | 498  | 58814  | 2   | 20833,0864  | 15478,85571 | 0,74299388 | 0,58679009 |
| 144 | A0A4W2EMY6 | Potassium voltage-gated channel interacting protein 3                  | LOC113900915   | 341  | 37632  | 5   | 415025,8355 | 341305,8335 | 0,8223725  | 0,1673304  |
| 145 | A0A4W2ENE8 | Serine/threonine-protein phosphatase (EC 3.1.3.16)                     | PPP1CB         | 445  | 49621  | 29  | 32404,04268 | 24242,07396 | 0,74811881 | 0,2306312  |
| 146 | A0A4W2EPP2 | glutamate dehydrogenase [NAD(P)(+)] (EC 1.4.1.3)                       | GLUD1          | 561  | 61631  | 2   | 56068,0457  | 57632,48944 | 1,02790259 | 0,98554619 |
| 147 | A0A4W2EPS9 | Acyl-CoA synthetase bubblegum family member 2                          |                | 678  | 75715  | 9   | 346153,9456 | 418989,3799 | 1,21041342 | 0,50568335 |
| 148 | A0A4W2ERA1 | Actin like 7B                                                          | ACTL7B         | 417  | 45563  | 14  | 973171,639  | 976415,3644 | 1,00333315 | 0,88415819 |
| 149 | A0A4W2ERC1 | Acyl-CoA thioesterase 4                                                | ACOT4          | 452  | 50576  | 6   | 350056,6619 | 383694,1836 | 1,09609165 | 0,58112233 |
| 150 | A0A4W2ERW4 | Multifunctional fusion protein [Includes: Poly [ADP-ribose] polymerase | PARP6          | 926  | 102497 | 42  | 905230,0236 | 928239,431  | 1,0254183  | 0,59042702 |
| 151 | A0A4W2ERZ2 | ATP synthase subunit b                                                 | ATP5PB         | 256  | 28806  | 17  | 1074464,479 | 1338911,975 | 1,24612028 | 0,19021066 |
| 152 | A0A4W2EU79 | Proteasome subunit alpha type                                          | PSMA3          | 266  | 29875  | 7   | 154059,3994 | 129915,6216 | 0,84328267 | 0,40544368 |
| 153 | A0A4W2EUH8 | Cytochrome c 2                                                         | LOC113901903   | 105  | 11740  | 8   | 964526,9754 | 1134967,697 | 1,17670913 | 0,68998524 |
| 154 | A0A4W2EV06 | ATP synthase F1 subunit delta                                          | ATP5F1D        | 168  | 17612  | 12  | 571994,6992 | 917214,9921 | 1,60353757 | 0,08183834 |
| 155 | A0A4W2EVB5 | Chromosome 1 open reading frame 56                                     |                | 350  | 37917  | 46  | 19966792,89 | 24586003,68 | 1,23134465 | 0,04799039 |
| 156 | A0A4W2EX92 | F-actin-capping protein subunit beta                                   | CAPZB          | 301  | 33741  | 62  | 2910306,859 | 3074473,947 | 1,05640886 | 0,68595929 |
| 157 | A0A4W2EY09 | Glycerol-3-phosphate dehydrogenase (EC 1.1.5.3)                        | GPD2           | 727  | 80797  | 42  | 4145116,164 | 5001681,623 | 1,2066445  | 0,12601957 |
| 158 | A0A4W2EYG8 | Cytochrome b-c1 complex subunit 6                                      | LOC113889946   | 91   | 10624  | 4   | 236600,7741 | 240077,9501 | 1,01469638 | 0,99186713 |
| 159 | A0A4W2EYI0 | ATP synthase subunit O, mitochondrial (ATP synthase peripheral stalk s | ATP5PO         | 213  | 23320  | 24  | 1332180,838 | 1420472,231 | 1,06627583 | 0,68644076 |
| 160 | A0A4W2EZ36 | Superoxide dismutase [Cu-Zn] (EC 1.15.1.1)                             |                | 330  | 35056  | 4   | 368270,4625 | 364247,3927 | 0,98907577 | 0,74714358 |
| 161 | A0A4W2F0A5 | NAD(P)H-hydrate epimerase (EC 5.1.99.6) (Apolipoprotein A-I-binding p  | APOA1BP AIBP   | 363  | 38374  | 3   | 102506,5105 | 92319,60857 | 0,9006219  | 0,72125757 |
| 162 | A0A4W2F1D4 | cAMP-dependent protein kinase (EC 2.7.11.11)                           | PRKACA         | 343  | 39889  | 14  | 955000,3999 | 1015698,421 | 1,06355811 | 0,60965439 |
| 163 | A0A4W2F2N0 | NADH dehydrogenase [ubiquinone] flavoprotein 3, mitochondrial (Com     | NDUFV3         | 447  | 48351  | 5   | 37546,76102 | 56369,01758 | 1,50130174 | 0,1162922  |
| 164 | A0A4W2F3T3 | Phosphate carrier protein, mitochondrial (Phosphate transport protein) | SLC25A3        | 361  | 40004  | 10  | 742950,6901 | 660083,3054 | 0,8884618  | 0,40180063 |
| 165 | A0A4W2F4K2 | ATP synthase subunit d, mitochondrial                                  | ATP5PD         | 161  | 18692  | 14  | 2555947,801 | 2394774,471 | 0,93694185 | 0,55350207 |
| 166 | A0A4W2F4Y9 | Cytochrome c oxidase subunit 7C, mitochondrial (Cytochrome c oxidase   | LOC113900450   | 63   | 7331   | 1   | 9011,594736 | 26051,64061 | 2,89090237 | 0,00119925 |
| 167 | A0A4W2F5L1 | Galactokinase 1                                                        | GALK1          | 392  | 42265  | 3   | 274385,8967 | 186349,7294 | 0,679152   | 0,53662976 |
| 168 | A0A4W2F767 | Transmembrane and coiled-coil domains 2                                | TMCO2          | 179  | 19952  | 3   | 3639,979652 | 7164,39474  | 1,96825132 | 0,02015952 |
| 169 | A0A4W2F7C1 | NADH dehydrogenase [ubiquinone] 1 beta subcomplex subunit 11, mitr     | NDUFB11        | 154  | 17573  | 3   | 61699,09432 | 71001,78569 | 1,15077517 | 0,39022065 |
| 170 | A0A4W2F836 | Sodium/potassium-transporting ATPase subunit beta                      | ATP1B3         | 279  | 31521  | 3   | 370720,9352 | 315751,7202 | 0,85172347 | 0,34645819 |
| 171 | A0A4W2F8A2 | NADH dehydrogenase [ubiquinone] 1 alpha subcomplex subunit 6 (Con      | NDUFA6         | 154  | 17799  | 1   | 22157,51937 | 22638,99025 | 1,02172946 | 0,94611234 |
| 172 | A0A4W2F904 | Dynein axonemal intermediate chain 7                                   | DNAI7          | 721  | 83769  | 2   | 83164,64705 | 55338,3622  | 0,66540729 | 0,08711828 |
| 173 | A0A4W2F919 | GLIPR1 like 1                                                          | GLIPR1L1       | 241  | 27110  | 12  | 233500,7676 | 279036,0722 | 1,19501137 | 0,23624216 |
| 174 | A0A4W2F9T8 | RIB43A domain with coiled-coils 2                                      | RIBC2          | 381  | 45169  | 6   | 193430,1333 | 165181,6032 | 0,85396003 | 0,4307402  |
| 175 | A0A4W2F9Z4 | Adenylate kinase 9                                                     | AK9            | 1902 | 220085 | 4   | 132181,4797 | 145803,144  | 1,10305274 | 0,6901099  |
| 176 | A0A4W2FA84 | Prohibitin                                                             | PHB1 PHB       | 272  | 29804  | 18  | 3602988,315 | 3043722,383 | 0,8447772  | 0,17101177 |
| 177 | A0A4W2FA94 | Complex III subunit 9                                                  | UQCR10 LOC113  | 64   | 7458   | 3   | 870137,2257 | 1099280,715 | 1,26334178 | 0,16343577 |
| 178 | A0A4W2FB35 | Dynein axonemal heavy chain 1                                          | DNAH1          | 4266 | 487581 | 14  | 287008,3931 | 300197,2863 | 1,04595299 | 0,80927883 |
| 179 | A0A4W2FBC3 | Phosphoinositide phospholipase C (EC 3.1.4.11)                         | PLCZ1          | 637  | 74100  | 19  | 2566315,915 | 3191061,987 | 1,24344083 | 0,31707487 |
| 180 | A0A4W2FCM2 | NADH dehydrogenase [ubiquinone] iron-sulfur protein 7, mitochondria    | NDUFS7         | 216  | 23771  | 4   | 114435,7864 | 140839,0011 | 1,23072516 | 0,14297185 |
| 181 | A0A4W2FCS9 | 10 kDa heat shock protein, mitochondrial (10 kDa chaperonin) (Chaper   | LOC113905824   | 259  | 27646  | 10  | 943685,8054 | 1092801,682 | 1,15801433 | 0,2719659  |
| 182 | A0A4W2FD88 | FAM161 centrosomal protein A                                           | FAM161A        | 721  | 84200  | 8   | 214700,1183 | 210773,1643 | 0,98170959 | 0,85738229 |
| 183 | A0A4W2FDF0 | T-complex protein 1 subunit delta                                      | CCT4           | 545  | 58389  | 14  | 613325,3306 | 448035,8476 | 0,73050276 | 0,07094405 |
| 184 | A0A4W2FDX9 | T-complex protein 1 subunit eta (TCP-1-eta) (CCT-eta)                  | CCT7           | 543  | 59443  | 10  | 115821,6171 | 80734,29043 | 0,69705719 | 0,10728168 |
| 185 | A0A4W2FE87 | Malate dehydrogenase (EC 1.1.1.37)                                     | MDH1           | 245  | 27009  | 2   | 306991,5539 | 305134,9246 | 1,14053602 | 0,29494411 |
| 186 | A0A4W2FED5 | Cytochrome b-c1 complex subunit 8 (Complex III subunit 8) (Complex     | UQCRQ LOC113   | 82   | 9720   | 3   | 296098,0434 | 249461,5183 | 0,84249634 | 0,41183708 |
| 187 | A0A4W2FEJ5 | Cytochrome c oxidase subunit 4                                         | COX4I1 LOC1138 | 169  | 19572  | 14  | 6846768,458 | 8852662,958 | 1,29296952 | 0,1762314  |

|     |            |                                                                                           |                |      |        |    |             |             |            |            |
|-----|------------|-------------------------------------------------------------------------------------------|----------------|------|--------|----|-------------|-------------|------------|------------|
| 188 | A0A4W2FEV1 | IQ motif containing F2                                                                    | IQCF2          | 163  | 19536  | 1  | 198823,9331 | 192429,319  | 0,9678378  | 0,92968875 |
| 189 | A0A4W2FF31 | Mitochondria-eating protein (Spermatogenesis-associated protein 18)                       | SPATA18        | 557  | 62902  | 23 | 4289766,601 | 3770239,477 | 0,87889152 | 0,45422246 |
| 190 | A0A4W2FF64 | Armadillo like helical domain containing 1                                                | ARMH1          | 442  | 49408  | 3  | 32706,47221 | 31073,24523 | 0,9500641  | 0,64233604 |
| 191 | A0A4W2FFW8 | Reactive oxygen species modulator 1 (Protein MGR2 homolog)                                | ROMO1          | 79   | 8183   | 2  | 57842,58072 | 62127,75637 | 1,07408341 | 0,49167987 |
| 192 | A0A4W2FG39 | OCIA domain-containing protein 1                                                          | OCIAD1         | 220  | 24540  | 3  | 194371,0619 | 162031,6151 | 0,83362005 | 0,32882975 |
| 193 | A0A4W2FG68 | Malate dehydrogenase (EC 1.1.1.37)                                                        | MDH2           | 338  | 35668  | 41 | 14308937,48 | 14836756,3  | 1,03688735 | 0,72791121 |
| 194 | A0A4W2FGL7 | Family with sequence similarity 162 member A                                              | FAM162A        | 156  | 17737  | 1  | 66015,27691 | 29061,82179 | 0,44022873 | 0,02448074 |
| 195 | A0A4W2FHP1 | Cytochrome c oxidase subunit 5A, mitochondrial (Cytochrome c oxidase subunit 5A)          | LOC113879686   | 152  | 16735  | 20 | 1268441,01  | 1430761,601 | 1,12796858 | 0,60268089 |
| 196 | A0A4W2FHT1 | Cytochrome b-c1 complex subunit 7 (Complex III subunit VII) (Ubiquinol oxidase subunit 7) | LOC113904403   | 160  | 19070  | 9  | 520142,8082 | 534998,6884 | 1,02856116 | 0,78473647 |
| 197 | A0A4W2FIJ7 | Protein FAM205A-like                                                                      | LOC113897149   | 1287 | 142386 | 8  | 476657,531  | 470493,952  | 0,98706917 | 0,98128023 |
| 198 | A0A4W2FIR4 | SPATA31/FAM205 domain-containing protein                                                  |                | 1388 | 153579 | 28 | 3315032,659 | 3732156,584 | 1,125828   | 0,31332659 |
| 199 | A0A4W2FJA4 | ADP/ATP translocase (ADP,ATP carrier protein)                                             | SLC25A31       | 323  | 35754  | 41 | 85281,94665 | 50486,13603 | 0,5919909  | 0,09803355 |
| 200 | A0A4W2FJN7 | NADH dehydrogenase [ubiquinone] 1 beta subcomplex subunit 8, mitochondrial                | NDUFB8         | 186  | 21684  | 4  | 37485,17768 | 21189,21515 | 0,56526917 | 0,00794545 |
| 201 | A0A4W2FL75 | Cilia and flagella associated protein 77                                                  | CFAP77         | 284  | 32907  | 7  | 47782,72672 | 48529,61173 | 1,01563086 | 0,85759486 |
| 202 | A0A4W2FNN4 | NADH dehydrogenase [ubiquinone] 1 alpha subcomplex subunit 11 (CoNDUFA11)                 | NDUFA11        | 141  | 14788  | 2  | 459038,6235 | 412404,7994 | 0,8984098  | 0,44635672 |
| 203 | A0A4W2FPB2 | Hydroxysteroid 17-beta dehydrogenase 10                                                   | HSD17B10       | 288  | 30151  | 13 | 820337,0242 | 735609,0393 | 0,89671564 | 0,3518797  |
| 204 | A0A4W2FPY7 | Ubiquitin carboxyl-terminal hydrolase (EC 3.4.19.12)                                      | UCHL1          | 339  | 37946  | 3  | 12235,37977 | 12009,08002 | 0,98150448 | 0,95989733 |
| 205 | A0A4W2FQC5 | Glutathione peroxidase                                                                    | GPX5           | 219  | 25049  | 10 | 214021,7194 | 98145,0973  | 0,45857541 | 0,08051892 |
| 206 | A0A4W2FQT7 | Proteasome subunit alpha type 7                                                           | PSMA4          | 261  | 29484  | 5  | 202765,4712 | 140761,6587 | 0,69420922 | 0,03997485 |
| 207 | A0A4W2FQT8 | Electron transfer flavoprotein-ubiquinone oxidoreductase (ETF-QO) (ETFDFH)                | ETFDFH         | 617  | 68612  | 10 | 234296,8113 | 263532,7939 | 1,12478182 | 0,44217414 |
| 208 | A0A4W2FRD0 | Thioredoxin domain containing 8                                                           | TXNDC8         | 127  | 14647  | 4  | 1422375,577 | 1608083,18  | 1,13056158 | 0,32005709 |
| 209 | A0A4W2FS86 | Peroxiredoxin-5 (EC 1.11.1.24)                                                            | PRDX5          | 219  | 23253  | 19 | 3553904,432 | 3283446,544 | 0,92389838 | 0,63375742 |
| 210 | A0A4W2FTM0 | Diazepam-binding inhibitor-like 5                                                         | LOC113877332   | 87   | 9788   | 12 | 60779,81213 | 138370,4251 | 2,27658527 | 0,01197623 |
| 211 | A0A4W2FUK5 | Adenylate kinase 2, mitochondrial (AK 2) (EC 2.7.4.3) (ATP-AMP transphosphorylase)        | AK2            | 308  | 33534  | 2  | 40073,6759  | 39519,30595 | 0,98616623 | 0,8502221  |
| 212 | A0A4W2FUX7 | Serine/threonine-protein phosphatase 2A activator (EC 5.2.1.8) (Phosphatase activator)    | PTPA           | 295  | 33617  | 1  | 8996,218138 | 7418,30962  | 0,82460313 | 0,54394233 |
| 213 | A0A4W2FV49 | Voltage dependent anion channel 2                                                         | VDAC2          | 294  | 31620  | 62 | 38105809,78 | 41124414,01 | 1,07921638 | 0,77661225 |
| 214 | A0A4W2FYY1 | ATP synthase subunit f, mitochondrial (ATP synthase membrane subunit f)                   | ATP5MF         | 88   | 10297  | 8  | 1229993,527 | 1291977,211 | 1,0503935  | 0,61019715 |
| 215 | A0A4W2FY09 | ADP/ATP translocase (ADP,ATP carrier protein)                                             | SLC25A4        | 298  | 32967  | 16 | 286598,5578 | 275180,311  | 0,96015944 | 0,65671342 |
| 216 | A0A4W2FY37 | AU RNA binding methylglutaconyl-CoA hydratase                                             | AUH            | 339  | 36204  | 5  | 834934,9091 | 860169,7011 | 1,03022366 | 0,79730225 |
| 217 | A0A4W2FY99 | Cilia and flagella associated protein 70                                                  | CFAP70         | 1124 | 126320 | 4  | 53591,75832 | 55358,95195 | 1,0329751  | 0,78017105 |
| 218 | A0A4W2FYF3 | Cilia and flagella associated protein 44                                                  | CFAP44         | 1852 | 213456 | 6  | 46191,32755 | 61246,80914 | 1,32593741 | 0,30268171 |
| 219 | A0A4W2FZN9 | C-type natriuretic peptide                                                                | NPPC           | 193  | 20294  | 7  | 77622,1764  | 148098,7024 | 1,90794318 | 0,05661821 |
| 220 | A0A4W2G035 | EF-hand domain containing 2                                                               | EFHC2          | 747  | 87007  | 17 | 1559102,305 | 1375319,807 | 0,88212287 | 0,25376422 |
| 221 | A0A4W2G038 | Chromosome 4 C7orf31 homolog                                                              | C7orf31        | 583  | 67483  | 14 | 176187,5906 | 172185,0843 | 0,9772827  | 0,69630941 |
| 222 | A0A4W2G0J9 | Chromosome 8 C9orf135 homolog                                                             | CFAP95 C8H9orf | 218  | 25092  | 2  | 197358,9081 | 219150,5424 | 1,11041627 | 0,55556509 |
| 223 | A0A4W2G0N7 | Heat shock protein 90 alpha family class A member 1                                       | HSP90AA1       | 776  | 89100  | 5  | 576278,3658 | 312118,3454 | 0,54161038 | 0,00337358 |
| 224 | A0A4W2G182 | Tektin                                                                                    | TEKT3          | 490  | 56700  | 45 | 754590,0423 | 801511,1362 | 1,06218091 | 0,80542501 |
| 225 | A0A4W2G186 | Cytochrome c                                                                              | LOC113891379   | 105  | 11704  | 4  | 83037,82735 | 117199,5899 | 1,4114     | 0,0123413  |
| 226 | A0A4W2G1A4 | Keratin, type II cytoskeletal 2 oral-like                                                 | KRT76          | 597  | 62847  | 2  | 136214,8924 | 478659,9625 | 3,5140061  | 0,04057013 |
| 227 | A0A4W2G1U8 | Abhydrolase domain containing 10                                                          | ABHD10         | 330  | 36403  | 9  | 597637,4872 | 703645,6393 | 1,17737869 | 0,35608126 |
| 228 | A0A4W2G4G1 | 2-iminobutanoate/2-iminopropanoate deaminase (EC 3.5.99.10) (Transaminase)                |                | 137  | 14517  | 3  | 168492,7634 | 173488,7086 | 1,0296508  | 0,70966283 |
| 229 | A0A4W2G5C6 | Dynein axonemal heavy chain 3                                                             | DNAH3          | 4069 | 466147 | 13 | 196652,7625 | 212960,9335 | 1,08292877 | 0,81205736 |
| 230 | A0A4W2G5W8 | Dynein regulatory complex subunit 7                                                       | DRC7           | 807  | 95871  | 2  | 36160,71544 | 28960,83109 | 0,80089209 | 0,2429258  |
| 231 | A0A4W2G637 | Solute carrier family 16 member 1                                                         | SLC16A1 LOC113 | 501  | 54297  | 6  | 24649,22636 | 27094,86486 | 1,09921766 | 0,79116163 |
| 232 | A0A4W2G685 | Chromosome 10 C15orf65 homolog                                                            | PIERCE2 C10H15 | 120  | 13771  | 1  | 18950,36487 | 15870,85653 | 0,83749609 | 0,75703385 |
| 233 | A0A4W2G6F8 | thioredoxin-disulfide reductase (EC 1.8.1.9)                                              | TXNRD2         | 488  | 52514  | 3  | 26424,04326 | 26847,04066 | 1,01600805 | 0,80567596 |
| 234 | A0A4W2G6V9 | NADH dehydrogenase [ubiquinone] 1 beta subcomplex subunit 5, mitochondrial                | NDUFB5         | 189  | 21589  | 1  | 20701,72427 | 14269,95991 | 0,68931263 | 0,37728664 |
| 235 | A0A4W2G9X2 | Cancer/testis antigen 47A-like                                                            | LOC113888212   | 281  | 30261  | 4  | 120557,7269 | 122546,3654 | 1,01649532 | 0,96551352 |

|     |            |                                                                        |                |      |        |     |             |             |            |            |
|-----|------------|------------------------------------------------------------------------|----------------|------|--------|-----|-------------|-------------|------------|------------|
| 236 | A0A4W2GAIO | Cytochrome b-c1 complex subunit 2, mitochondrial                       | LOC113883210   | 453  | 48149  | 57  | 4485094,827 | 4524615,842 | 1,00881163 | 0,9049328  |
| 237 | A0A4W2GC72 | NADH dehydrogenase [ubiquinone] 1 beta subcomplex subunit 7 (Com       | NDUFB7         | 137  | 16398  | 2   | 112417,4191 | 130064,6817 | 1,15697979 | 0,37102903 |
| 238 | A0A4W2GCD2 | NADH dehydrogenase [ubiquinone] iron-sulfur protein 2, mitochondria    | NDUFS2         | 510  | 57393  | 4   | 199985,7476 | 118104,9516 | 0,59056684 | 0,0864451  |
| 239 | A0A4W2GCX1 | Coiled-coil domain containing 113                                      | CCDC113        | 323  | 37773  | 3   | 66789,86242 | 82070,64813 | 1,228789   | 0,28573142 |
| 240 | A0A4W2GDN1 | Acetyl-CoA acetyltransferase 1                                         | ACAT1          | 422  | 44889  | 19  | 927723,6351 | 806597,6988 | 0,86943748 | 0,4451806  |
| 241 | A0A4W2GDV6 | NADH-cytochrome b5 reductase (EC 1.6.2.2)                              | CYB5R1         | 304  | 33723  | 17  | 5151143,304 | 4189221,709 | 0,81326056 | 0,36238864 |
| 242 | A0A4W2GE75 | Tubulin polymerization promoting protein family member 2               | TPPP2          | 171  | 18564  | 9   | 171172,7159 | 392984,282  | 2,29583482 | 0,00057773 |
| 243 | A0A4W2GE56 | aldehyde dehydrogenase (NAD(+)) (EC 1.2.1.3)                           | ALDH7A1        | 539  | 58596  | 2   | 66058,99358 | 61748,9526  | 0,93475467 | 0,8797945  |
| 244 | A0A4W2GEV4 | Glyceraldehyde-3-phosphate dehydrogenase (EC 1.2.1.12)                 | GAPDH          | 333  | 35868  | 18  | 5237458,376 | 7330088,135 | 1,39955062 | 0,58412367 |
| 245 | A0A4W2GFX5 | Milk fat globule-EGF factor 8 protein                                  | MFGE8          | 572  | 63527  | 16  | 2303661,254 | 2083488,963 | 0,90442506 | 0,39961818 |
| 246 | A0A4W2GG79 | Fibronectin type-II domain-containing protein                          |                | 151  | 17304  | 53  | 42818711,73 | 22999374,18 | 0,53713373 | 0,21776875 |
| 247 | A0A4W2GGE1 | Proteasome subunit alpha type                                          | PSMA2          | 234  | 25899  | 4   | 113918,9787 | 118542,9307 | 1,04058983 | 0,72780991 |
| 248 | A0A4W2GGZ0 | NADH dehydrogenase [ubiquinone] flavoprotein 1, mitochondrial (EC 7    | NDUFV1         | 464  | 50652  | 15  | 805154,7645 | 714788,7784 | 0,88776569 | 0,38674356 |
| 249 | A0A4W2GHS6 | Proteasome 26S subunit, non-ATPase 2                                   | PSMD2 LOC1138  | 1688 | 188624 | 1   | 3224,700484 | 2654,966982 | 0,82332204 | 0,59202576 |
| 250 | A0A4W2GIZ5 | A-kinase anchoring protein 3                                           | AKAP3          | 810  | 89355  | 134 | 1497013,05  | 1259442,392 | 0,84130355 | 0,32128415 |
| 251 | A0A4W2GJ13 | 14-3-3 protein theta                                                   | YWHAQ          | 421  | 47052  | 2   | 23521,76904 | 10198,52725 | 0,43357824 | 0,00601817 |
| 252 | A0A4W2GL58 | Family with sequence similarity 24 member A                            |                | 89   | 9388   | 2   | 2596434,044 | 2053930,874 | 0,79105837 | 0,34316798 |
| 253 | A0A4W2GL67 | Membrane cofactor protein                                              |                | 335  | 37318  | 3   | 37736,95551 | 36014,61985 | 0,95435944 | 0,6647011  |
| 254 | A0A4W2GLB6 | NADH dehydrogenase [ubiquinone] 1 alpha subcomplex subunit 5 (Com      | NDUFA5         | 116  | 13316  | 10  | 230965,0303 | 194124,46   | 0,84049286 | 0,34465906 |
| 255 | A0A4W2GMB7 | Cilia and flagella associated protein 65                               | CFAP65         | 1740 | 196959 | 2   | 32191,84334 | 28888,13367 | 0,89737432 | 0,68206242 |
| 256 | A0A4W2GMQ8 | STI1 domain-containing protein                                         |                | 238  | 26971  | 1   | 28107,99437 | 22880,61102 | 0,81402503 | 0,63460243 |
| 257 | A0A4W2GMV9 | Cytochrome c oxidase subunit 7A-related protein, mitochondrial         | COX7A2L LOC11: | 114  | 12544  | 2   | 32784,71713 | 42733,76562 | 1,30346605 | 0,02705586 |
| 258 | A0A4W2GNK5 | Transmembrane protein 256                                              | TMEM256        | 113  | 11775  | 1   | 12394,17221 | 14828,39973 | 1,19640098 | 0,60384636 |
| 259 | A0A4W2GPB3 | SPEM family member 2                                                   | SPEM2          | 497  | 56428  | 1   | 13343,85138 | 17455,65782 | 1,3081424  | 0,19544292 |
| 260 | A0A4W2GQJ6 | Nucleoside diphosphate kinase 7 (EC 2.7.4.6)                           | NME7           | 377  | 42599  | 16  | 888640,5963 | 801750,9709 | 0,90222186 | 0,38253668 |
| 261 | A0A4W2GQM1 | Leucine rich repeat containing 37A                                     | LRRRC37A       | 2532 | 278113 | 72  | 5216374,377 | 6663611,774 | 1,27744124 | 0,11549595 |
| 262 | A0A4W2GQY8 | NADH dehydrogenase [ubiquinone] 1 alpha subcomplex subunit 2           |                | 92   | 10600  | 4   | 402773,2735 | 461634,1185 | 1,1461389  | 0,27913988 |
| 263 | A0A4W2GRQ0 | MICOS complex subunit                                                  | APOO           | 210  | 24002  | 5   | 203703,0505 | 143861,5588 | 0,70623174 | 0,13604902 |
| 264 | A0A4W2GRR1 | Fascin                                                                 | FSCN3          | 498  | 56194  | 28  | 1596760,98  | 1529478,052 | 0,95786287 | 0,65834651 |
| 265 | A0A4W2GSC1 | Cytochrome c oxidase subunit 5B, mitochondrial (Cytochrome c oxidase   | LOC113894051   | 129  | 13834  | 12  | 1795561,714 | 2043682,743 | 1,13818574 | 0,88680043 |
| 266 | A0A4W2GUI0 | L-lactate dehydrogenase (EC 1.1.1.27)                                  | LDHA           | 332  | 36598  | 29  | 9630995,258 | 10614861,74 | 1,10215626 | 0,9775027  |
| 267 | A0A4W2GVQ9 | Sperm associated antigen 16                                            | SPAG16         | 628  | 70485  | 1   | 10481,99887 | 29133,4203  | 2,7793764  | 0,00079217 |
| 268 | A0A4W2GW60 | Histone H2A/H2B/H3 domain-containing protein                           |                | 136  | 15678  | 2   | 61558,24147 | 38379,69869 | 0,62346971 | 0,11037522 |
| 269 | A0A4W2GWM3 | Dihydrolipoyllysine-residue succinyltransferase component of 2-oxogluc | DLST           | 529  | 56572  | 20  | 706956,9036 | 734743,0191 | 1,03930383 | 0,79520435 |
| 270 | A0A4W2GWX1 | Polyamine modulated factor 1 binding protein 1                         | PMFBP1         | 1006 | 117813 | 3   | 8288,711392 | 5805,802859 | 0,70044698 | 0,35921855 |
| 271 | A0A4W2GWX2 | Dynein regulatory complex protein 10 (IQ domain-containing protein D   | IQCD           | 444  | 51570  | 2   | 27090,18183 | 23543,65456 | 0,86908441 | 0,31676689 |
| 272 | A0A4W2GXD6 | Proteasome subunit alpha type                                          | PSMA6          | 203  | 22842  | 2   | 8587,083442 | 9031,759137 | 1,05178425 | 0,68310932 |
| 273 | A0A4W2GXF1 | Glucose-6-phosphatase (EC 3.1.3.9)                                     | G6PC3          | 346  | 38742  | 2   | 18366,74988 | 18182,23606 | 0,98995392 | 0,9445032  |
| 274 | A0A4W2GX12 | Crystallin zeta                                                        | CRYZ           | 330  | 35382  | 3   | 163735,4311 | 140239,4773 | 0,85650049 | 0,45245146 |
| 275 | A0A4W2GXN7 | Sperm acrosome associated 4                                            | SPACA4         | 126  | 12964  | 3   | 298922,2207 | 388515,4528 | 1,29972088 | 0,33266935 |
| 276 | A0A4W2GYF8 | Peptidase, mitochondrial processing beta subunit                       | PMPCB          | 491  | 54266  | 2   | 57390,91435 | 71000,23856 | 1,23713378 | 0,21256515 |
| 277 | A0A4W2GZC3 | Propionyl-CoA carboxylase subunit beta                                 | PCCB           | 544  | 58644  | 1   | 30894,8019  | 29214,52936 | 0,9456131  | 0,34908831 |
| 278 | A0A4W2GZU2 | Acetyl-CoA acyltransferase 2                                           | ACAA2          | 645  | 68438  | 19  | 556476,8512 | 549454,0504 | 0,98737989 | 0,98268466 |
| 279 | A0A4W2H0C9 | LanC like 1                                                            | LANCL1         | 399  | 45309  | 6   | 622975,2453 | 571857,2598 | 0,9179454  | 0,53274226 |
| 280 | A0A4W2H0D3 | Aldehyde dehydrogenase 2 family member                                 | ALDH2          | 520  | 56653  | 19  | 1408174,771 | 1579930,923 | 1,12197076 | 0,3821682  |
| 281 | A0A4W2H1Z3 | Aldose reductase                                                       | LOC113891189   | 303  | 34500  | 1   | 28022,97979 | 27704,83711 | 0,98864708 | 0,78121162 |
| 282 | A0A4W2H1Z5 | T-complex protein 1 subunit theta (CCT-theta)                          | CCT8           | 553  | 60203  | 6   | 344372,8723 | 216916,1881 | 0,62988756 | 0,1137795  |
| 283 | A0A4W2H2D6 | Proteasome subunit beta                                                | PSMB4          | 264  | 29031  | 1   | 7531,310721 | 3939,30598  | 0,52305716 | 0,01736808 |



|     |            |                                                                           |               |      |        |     |             |             |            |            |
|-----|------------|---------------------------------------------------------------------------|---------------|------|--------|-----|-------------|-------------|------------|------------|
| 284 | A0A4W2H537 | Tektin                                                                    | TEKT2         | 430  | 49886  | 36  | 7587333,156 | 7637977,889 | 1,00667491 | 0,95064382 |
| 285 | A0A4W2H5E7 | Cytochrome c oxidase subunit 7A2                                          |               | 83   | 9283   | 6   | 2597632,53  | 2916622,386 | 1,12280022 | 0,48864967 |
| 286 | A0A4W2H5R5 | NADH dehydrogenase [ubiquinone] 1 beta subcomplex subunit 9 (Com          | NDUFB9        | 179  | 21789  | 4   | 114442,5576 | 121534,8947 | 1,0619729  | 0,59044109 |
| 287 | A0A4W2H658 | Pyruvate dehydrogenase E1 component subunit beta (EC 1.2.4.1)             | PDHB          | 359  | 39098  | 40  | 4165973,084 | 4891160,587 | 1,17407398 | 0,46037027 |
| 288 | A0A4W2H6M4 | Actin like 10                                                             | ACTL10        | 383  | 41133  | 3   | 86744,44624 | 83371,60856 | 0,96111754 | 0,8684529  |
| 289 | A0A4W2H7K9 | Family with sequence similarity 166 member C                              | FAM166C       | 201  | 23321  | 2   | 39388,5512  | 37731,98071 | 0,95794284 | 0,53923673 |
| 290 | A0A4W2H888 | Methionine adenosyltransferase 1A                                         | DYDC1         | 175  | 20730  | 1   | 26911,49864 | 30168,8353  | 1,12103884 | 0,84134278 |
| 291 | A0A4W2H8Q1 | SAMM50 sorting and assembly machinery component                           | SAMM50        | 469  | 52042  | 8   | 262299,9369 | 264832,6139 | 1,00965565 | 0,9942525  |
| 292 | A0A4W2H983 | NAD(+) kinase (EC 2.7.1.23)                                               | NADK2         | 555  | 61200  | 3   | 76409,73079 | 75489,57722 | 0,98795764 | 0,76460693 |
| 293 | A0A4W2HAB9 | Spermatogenesis associated 19                                             | SPATA19       | 154  | 17899  | 8   | 2186560,914 | 2345861,26  | 1,07285429 | 0,61651972 |
| 294 | A0A4W2HBQ2 | Alpha-L-fucosidase (EC 3.2.1.51)                                          | FUCA1         | 444  | 51405  | 1   | 32783,03786 | 38992,81969 | 1,18942057 | 0,8135249  |
| 295 | A0A4W2HCD2 | Cilia and flagella associated protein 57                                  | CFAP57        | 1279 | 148428 | 6   | 139923,8068 | 136551,1272 | 0,97589631 | 0,73172348 |
| 296 | A0A4W2HCZ3 | Fibrous sheath interacting protein 2                                      | FSIP2         | 6725 | 757955 | 128 | 146693,5421 | 175135,6768 | 1,19388812 | 0,58840789 |
| 297 | A0A4W2HD14 | Outer dense fiber of sperm tails 3B                                       | ODF3B         | 395  | 42380  | 2   | 78338,42145 | 80640,35706 | 1,0293845  | 0,85764438 |
| 298 | A0A4W2HD58 | ATP-binding cassette sub-family A member 17-like                          | LOC113883545  | 1334 | 150599 | 2   | 15899,46687 | 12352,53105 | 0,7769148  | 0,75802595 |
| 299 | A0A4W2HDC1 | Calicin                                                                   | CCIN          | 588  | 66890  | 64  | 47284611,14 | 44091518,81 | 0,93247079 | 0,48562773 |
| 300 | A0A4W2HDX7 | Cytochrome b-c1 complex subunit 10                                        | UQCR11 LOC113 | 56   | 6520   | 2   | 37756,41904 | 49346,84427 | 1,30697893 | 0,24628605 |
| 301 | A0A4W2HF26 | Glycerol-3-phosphate dehydrogenase [NAD(+)] (EC 1.1.1.8)                  |               | 351  | 38301  | 3   | 59093,27908 | 66691,43251 | 1,12857898 | 0,66852744 |
| 302 | A0A4W2HFN3 | Cullin associated and neddylation dissociated 1                           | CAND1         | 1223 | 135587 | 3   | 93743,90548 | 64057,6712  | 0,68332625 | 0,11084248 |
| 303 | A0A4W2HG11 | AFG3 like matrix AAA peptidase subunit 2                                  | AFG3L2        | 805  | 89388  | 11  | 838441,3903 | 1119186,113 | 1,3348412  | 0,08500163 |
| 304 | A0A4W2HG44 | Histidine triad nucleotide binding protein 2                              | HINT2         | 165  | 17317  | 6   | 195313,8458 | 258661,4139 | 1,32433731 | 0,08776537 |
| 305 | A0A4W2HGQ2 | Sperm acrosome-associated protein 5                                       | LOC113886686  | 156  | 17580  | 3   | 70929,81799 | 116407,699  | 1,64116732 | 0,48040314 |
| 306 | A0A4W2HH02 | IZUMO family member 2                                                     | IZUMO2        | 221  | 25293  | 1   | 41509,70195 | 61005,10437 | 1,46965894 | 0,65115601 |
| 307 | A0A4W2HH43 | Electron transfer flavoprotein subunit alpha (Alpha-ETF)                  | ETF A         | 311  | 32704  | 16  | 17117,46513 | 10974,48456 | 0,64112791 | 0,44407548 |
| 308 | A0A4W2HHB8 | proton-translocating NAD(P)(+) transhydrogenase (EC 7.1.1.1)              | NNT           | 1034 | 108491 | 8   | 530261,8471 | 502503,6745 | 0,94765195 | 0,67964036 |
| 309 | A0A4W2HI57 | Tektin                                                                    | TEKT1         | 418  | 48719  | 16  | 480959,647  | 566878,8506 | 1,17864119 | 0,14422094 |
| 310 | A0A4W2HIR1 | HtrA serine peptidase 2                                                   | HTRA2         | 361  | 38786  | 4   | 162106,5422 | 184863,7919 | 1,14038452 | 0,56547423 |
| 311 | A0A4W2HIT4 | Dynein axonemal heavy chain 6                                             | DNAH6         | 4154 | 475638 | 14  | 235762,762  | 213455,3143 | 0,9053818  | 0,41612594 |
| 312 | A0A4W2HIX9 | Hydroxysteroid dehydrogenase like 2                                       | HSDL2         | 418  | 45135  | 10  | 1278947,271 | 1231166,054 | 0,9626402  | 0,78461962 |
| 313 | A0A4W2HJ36 | Heat shock protein family A (Hsp70) member 4 like                         | HSPA4L        | 1023 | 115519 | 5   | 78455,61579 | 65642,04682 | 0,83667748 | 0,3543384  |
| 314 | A0A4W2HJ53 | NADH dehydrogenase [ubiquinone] 1 alpha subcomplex subunit 13             | GATAD2A       | 174  | 19597  | 2   | 484659,579  | 457007,2235 | 0,94294479 | 0,58421126 |
| 315 | A0A4W2HJC0 | Testis expressed 51                                                       |               | 168  | 18788  | 1   | 11347,62736 | 18647,74492 | 1,64331664 | 0,19849697 |
| 316 | A0A4W2HK76 | Carboxypeptidase Q (Plasma glutamate carboxypeptidase)                    | CPQ           | 484  | 53024  | 12  | 11897248,1  | 15062631,07 | 1,2660601  | 0,13476126 |
| 317 | A0A4W2HKM7 | NADH dehydrogenase [ubiquinone] 1 beta subcomplex subunit 4 (Com          | NDUFB4        | 129  | 15184  | 4   | 495286,1538 | 462773,9412 | 0,93435671 | 0,58466611 |
| 318 | A0A4W2HKS8 | Actin like 9                                                              | ACTL9         | 416  | 45540  | 23  | 1783217,02  | 2182245,904 | 1,22376911 | 0,10255887 |
| 319 | A0A4W2HL85 | Myeloid leukemia factor 1                                                 | MLF1          | 270  | 31227  | 7   | 108781,3667 | 125979,0793 | 1,15809429 | 0,31826418 |
| 320 | A0A4W2HLP1 | FUN14 domain containing 2                                                 | FUNDC2        | 190  | 20577  | 6   | 316658,0152 | 363109,6452 | 1,14669337 | 0,43688663 |
| 321 | A0A4W2HLQ2 | Tubulin beta chain                                                        | TUBB3         | 512  | 56029  | 104 | 89672,98977 | 182911,0686 | 2,03975655 | 0,04932613 |
| 322 | A0A4W2HM97 | L-serine ammonia-lyase (EC 4.3.1.17)                                      | SRR           | 339  | 36681  | 4   | 39595,25647 | 35763,19111 | 0,90321908 | 0,47559661 |
| 323 | A0A4W2HME8 | Spermatogenesis associated 48                                             | SPATA48       | 440  | 49710  | 3   | 69875,61459 | 83559,66826 | 1,19583447 | 0,61600254 |
| 324 | A0A4W2HN15 | Sorbitol dehydrogenase (SDH) (XDH) (EC 1.1.1.14) (EC 1.1.1.9) (L-iditol 2 | SORD          | 356  | 38127  | 3   | 134761,7294 | 116264,4562 | 0,8627409  | 0,32583258 |
| 325 | A0A4W2HP47 | Proteasome subunit alpha type                                             | PSMA5         | 241  | 26411  | 4   | 212554,0154 | 225547,4667 | 1,06113011 | 0,63729274 |
| 326 | A0A4W2HPH7 | ADP/ATP translocase (ADP,ATP carrier protein)                             | SLC25A6       | 410  | 44462  | 20  | 1542812,619 | 1428463,709 | 0,92588283 | 0,56792582 |
| 327 | A0A4W2HPP0 | Histone H2A                                                               |               | 238  | 26496  | 8   | 444589,7754 | 341802,3891 | 0,76880398 | 0,31950158 |
| 328 | A0A4W2HQP5 | Nucleoredoxin (EC 1.8.1.8)                                                | GLOD4         | 594  | 65077  | 1   | 23266,71825 | 19586,93315 | 0,8418434  | 0,29930618 |
| 329 | A0A4W2HQW9 | Stress-70 protein, mitochondrial (75 kDa glucose-regulated protein) (H    | HSPA9         | 679  | 73772  | 19  | 1931228,684 | 1874522,799 | 0,97063741 | 0,80028109 |
| 330 | A0A4W2HRF0 | Citrate synthase                                                          | CS            | 466  | 51773  | 41  | 10278665,6  | 10228335,76 | 0,99510347 | 0,86501319 |
| 331 | A0A4W2HRM3 | Leucine-rich repeat and IQ domain-containing protein 4-like               | LOC113888572  | 565  | 64870  | 1   | 27653,71627 | 16502,35209 | 0,59674989 | 0,14109104 |

|     |            |                                                                                             |                     |      |        |     |             |             |            |            |
|-----|------------|---------------------------------------------------------------------------------------------|---------------------|------|--------|-----|-------------|-------------|------------|------------|
| 332 | A0A4W2HRY1 | EF-hand calcium binding domain 5                                                            | EFCAB5              | 1505 | 172053 | 4   | 24082,62548 | 18765,14713 | 0,77919856 | 0,55904665 |
| 333 | A0A4W2HS31 | 3-hydroxyisobutyrate dehydrogenase, mitochondrial (EC 1.1.1.31)                             | HIBADH              | 336  | 35410  | 20  | 938652,6041 | 1101883,561 | 1,17389922 | 0,18099919 |
| 334 | A0A4W2HSU6 | T-complex protein 1 subunit gamma                                                           | CCT3                | 507  | 56483  | 12  | 1388038,356 | 1007204,727 | 0,72563177 | 0,09407357 |
| 335 | A0A4W2HSV6 | Rab GDP dissociation inhibitor                                                              | GDI1                | 447  | 50566  | 2   | 96771,51962 | 91234,5605  | 0,94278317 | 0,81002075 |
| 336 | A0A4W2HT18 | Actin related protein T2                                                                    | ACTRT2              | 377  | 41913  | 56  | 11343764,94 | 12147537,31 | 1,07085587 | 0,6139985  |
| 337 | A0A4W2HTE9 | H(+)-transporting two-sector ATPase (EC 7.1.2.2)                                            | ATP6V1A             | 618  | 68475  | 2   | 51112,49326 | 42760,683   | 0,83659944 | 0,28502442 |
| 338 | A0A4W2HTI2 | Histone H2B subacrosomal variant                                                            | LOC113879192        | 122  | 14238  | 20  | 29251487,54 | 26267647,6  | 0,89799357 | 0,52577928 |
| 339 | A0A4W2HU94 | Serpin A3-1 (Serpin family A member 5)                                                      | SERPINA5 LOC11      | 374  | 41701  | 2   | 68286,91725 | 63771,90259 | 0,9338817  | 0,57453664 |
| 340 | A0A4W2HVV6 | Outer dense fiber of sperm tails 2                                                          | ODF2                | 701  | 80750  | 294 | 889093,0831 | 766609,1222 | 0,86223719 | 0,3571311  |
| 341 | A0A4W2HVJ6 | Electron transfer flavoprotein subunit beta                                                 | ETFB                | 357  | 38331  | 6   | 622745,3218 | 587254,944  | 0,9430098  | 0,66314443 |
| 342 | A0A4W2HVK1 | pyruvate carboxylase (EC 6.4.1.1)                                                           | PC                  | 1266 | 139249 | 3   | 23473,7703  | 24521,12874 | 1,04461825 | 0,71265616 |
| 343 | A0A4W2HVV4 | Chromosome 5 C12orf10 homolog                                                               | MYG1                | 381  | 42967  | 7   | 282695,1247 | 311150,6895 | 1,10065814 | 0,48924749 |
| 344 | A0A4W2HW44 | Cytosol aminopeptidase (EC 3.4.11.1) (EC 3.4.11.5) (EC 3.4.13.23) (Cysteine aminopeptidase) | LAP3                | 519  | 56289  | 24  | 1331944,65  | 1347888,986 | 1,01197072 | 0,92745757 |
| 345 | A0A4W2HWC1 | Dihydrolipoamide acetyltransferase component of pyruvate dehydrogenase complex              | PDHX                | 501  | 53886  | 13  | 535456,5238 | 630121,4483 | 1,17679292 | 0,31414196 |
| 346 | A0A4W2HWK9 | Isocitrate dehydrogenase [NAD] subunit, mitochondrial                                       | IDH3B               | 385  | 42497  | 4   | 163111,7133 | 197887,4184 | 1,21320177 | 0,16051024 |
| 347 | A0A4W2HWP1 | Renin receptor (ATPase H(+)-transporting lysosomal accessory protein 1)                     | ATP6AP2             | 377  | 42449  | 1   | 44566,17039 | 29936,68168 | 0,67173557 | 0,27652982 |
| 348 | A0A4W2HWQ4 | Coiled-coil domain containing 81                                                            | CCDC81              | 565  | 66189  | 3   | 90086,4404  | 75172,39108 | 0,83444735 | 0,23365973 |
| 349 | A0A4W2HXB2 | Seminal plasma protein PDC-109                                                              | LOC113876423        | 134  | 15580  | 25  | 13496380,86 | 8083728,625 | 0,59895528 | 0,23746183 |
| 350 | A0A4W2HXI7 | Protein SCO1 homolog, mitochondrial                                                         | SCO1                | 305  | 33717  | 2   | 34589,24056 | 31475,87337 | 0,9099903  | 0,99503274 |
| 351 | A0A4W2HXJ5 | Adenylate kinase isoenzyme 1 (AK 1) (EC 2.7.4.3) (EC 2.7.4.6) (ATP-AMP kinase)              | AK1                 | 211  | 23442  | 21  | 11936892,78 | 13543453,37 | 1,13458784 | 0,27482379 |
| 352 | A0A4W2HXU7 | Radial spoke head 3                                                                         | RSPH3               | 606  | 68696  | 3   | 188067,6659 | 167561,5406 | 0,89096411 | 0,56021574 |
| 353 | A0A4W2HY76 | Chaperonin containing TCP1 subunit 6B                                                       | CCT6B               | 518  | 56605  | 8   | 23453,99399 | 12497,65132 | 0,53285813 | 0,05883556 |
| 354 | A0A4W2HY90 | DnaJ heat shock protein family (Hsp40) member C11                                           | DNAJC11             | 559  | 63237  | 2   | 48852,11253 | 29667,03308 | 0,6072825  | 0,10496673 |
| 355 | A0A4W2HYH2 | protein deglycase (EC 3.5.1.124) (Maillard deglycase) (Parkinsonism-associated protein 7)   | PARK7               | 189  | 20035  | 10  | 468845,1469 | 551101,0754 | 1,1754437  | 0,26529007 |
| 356 | A0A4W2HYH3 | Dynein light chain Tctex-type 1                                                             | DYNLT1              | 113  | 12452  | 3   | 30535,38881 | 24412,08602 | 0,79946865 | 0,25518546 |
| 357 | A0A4W2HYZ9 | Mitochondrial carrier 2                                                                     | MTCH2               | 303  | 33280  | 49  | 25605879,77 | 24516929,06 | 0,95747263 | 0,76924753 |
| 358 | A0A4W2HZD8 | Meiosis-specific nuclear structural protein 1                                               | MNS1                | 526  | 64310  | 3   | 31310,99931 | 28339,84985 | 0,90510844 | 0,424992   |
| 359 | A0A4W2HZR1 | Mitochondrial glutathione transporter SLC25A40 (Solute carrier family 25 member 40)         | LOC113891614        | 339  | 38277  | 2   | 119808,5889 | 116069,6464 | 0,96879237 | 0,92908176 |
| 360 | A0A4W2HZT3 | Testis expressed 49                                                                         | TEX49               | 131  | 15447  | 1   | 73881,55817 | 61023,9253  | 0,82596966 | 0,19972847 |
| 361 | A0A4W2I018 | Solute carrier family 2, facilitated glucose transporter member 5 (Fructose transporter)    | SLC2A5              | 508  | 56009  | 1   | 612257,6983 | 569695,9952 | 0,930484   | 0,60635758 |
| 362 | A0A4W2I0K8 | Prohibitin                                                                                  | PHB2                | 299  | 33357  | 14  | 1047179,325 | 981020,5499 | 0,93682192 | 0,67407358 |
| 363 | A0A4W2I1H5 | Histidine triad nucleotide binding protein 1                                                | HINT1               | 126  | 13779  | 1   | 12036,80117 | 15119,88085 | 1,25613779 | 0,34408882 |
| 364 | A0A4W2I1K4 | Coiled-coil domain containing 63                                                            | CCDC63              | 558  | 65966  | 7   | 108288,3821 | 89174,63144 | 0,82349214 | 0,38636409 |
| 365 | A0A4W2I1X5 | Succinate dehydrogenase cytochrome b560 subunit, mitochondrial                              | SDHC                | 135  | 14561  | 1   | 182419,2296 | 269970,0584 | 1,47994298 | 0,12283922 |
| 366 | A0A4W2I292 | hexokinase (EC 2.7.1.1)                                                                     | HK1                 | 921  | 102497 | 63  | 16578554,08 | 15291533,27 | 0,92236833 | 0,46276144 |
| 367 | A0A4W2I2Q2 | Heat shock 70 kDa protein 1-like                                                            | HSPA1L LOC113879192 | 641  | 70363  | 34  | 2747360,852 | 2054025,851 | 0,74763599 | 0,08848345 |
| 368 | A0A4W2I344 | Cytochrome b-c1 complex subunit 1, mitochondrial                                            | UQCRC1              | 490  | 53827  | 37  | 5795285,023 | 6850980,405 | 1,18216453 | 0,37435474 |
| 369 | A0A4W2I3C7 | Hyaluronidase (EC 3.2.1.35)                                                                 | LOC113891262        | 554  | 62449  | 46  | 26756,24338 | 90056,3633  | 3,36580745 | 0,24314133 |
| 370 | A0A4W2I4L1 | Aspartyl aminopeptidase                                                                     | DNPEP               | 433  | 47465  | 6   | 362676,3355 | 294904,9845 | 0,81313545 | 0,53358398 |
| 371 | A0A4W2I5J8 | ATP-dependent 6-phosphofructokinase (ATP-PFK) (Phosphofructokinase)                         | PFKM                | 850  | 93427  | 5   | 206367,3277 | 246597,0667 | 1,19494238 | 0,21239082 |
| 372 | A0A4W2I5U3 | Apolipoprotein A-II (Apolipoprotein A2)                                                     | APOA2               | 100  | 11202  | 2   | 4701,18315  | 6399,069795 | 1,36116156 | 0,22986715 |
| 373 | A0A4W2I6G9 | Sperm acrosome associated 3                                                                 | SPACA3              | 163  | 18099  | 14  | 10767314,32 | 13597619,81 | 1,26286086 | 0,14965881 |
| 374 | A0A4W2I6S5 | Peptidase S1 domain-containing protein                                                      |                     | 350  | 38411  | 7   | 727835,2424 | 534141,1247 | 0,73387642 | 0,19115701 |
| 375 | A0A4W2I8C2 | Dynein axonemal intermediate chain 1                                                        | DNAI1               | 734  | 83124  | 4   | 96337,36552 | 108124,5499 | 1,12235319 | 0,39550897 |
| 376 | A0A4W2I8F3 | NADH dehydrogenase [ubiquinone] iron-sulfur protein 8, mitochondria                         | NDUFS8              | 195  | 22231  | 3   | 426853,4352 | 412359,1219 | 0,96604382 | 0,95461429 |
| 377 | A0A4W2I8P6 | Acyl-CoA dehydrogenase very long chain                                                      | ACADVL              | 677  | 72731  | 39  | 4133288,368 | 4598815,102 | 1,11262866 | 0,45418626 |
| 378 | A0A4W2I8R7 | Dihydroxyacetone phosphate acyltransferase (DAP-AT) (DHAP-AT) (EC 2.3.1.10)                 | GNPAT               | 680  | 77682  | 11  | 163063,44   | 146258,7661 | 0,89694395 | 0,39391665 |
| 379 | A0A4W2I8V6 | Mitochondrial chaperone BCS1 (BCS1-like protein)                                            | BCS1L LOC113879192  | 419  | 47504  | 4   | 185847,1107 | 163104,0417 | 0,87762484 | 0,27337111 |

|     |            |                                                                           |               |     |       |    |             |             |            |            |
|-----|------------|---------------------------------------------------------------------------|---------------|-----|-------|----|-------------|-------------|------------|------------|
| 380 | A0A4W2I9C4 | Enoyl-CoA hydratase, short chain 1                                        | ECHS1         | 290 | 31178 | 5  | 115460,318  | 92581,4781  | 0,80184673 | 0,16480327 |
| 381 | A0A4W2I9M3 | Ribonucleic acid export 1                                                 | RAE1          | 368 | 40981 | 1  | 19402,71019 | 18947,96372 | 0,97656273 | 0,87020363 |
| 382 | A0A4W2I9W7 | RAB2A, member RAS oncogene family                                         | RAB2A         | 212 | 23519 | 47 | 8151631,785 | 7842040,824 | 0,96202098 | 0,658865   |
| 383 | A0A4W2I8B2 | Leucine rich repeat containing 74A                                        | LRRC74A       | 486 | 54176 | 2  | 178013,3562 | 213658,123  | 1,20023647 | 0,15895247 |
| 384 | A0A4W2I854 | Fructose-bisphosphate aldolase (EC 4.1.2.13)                              | ALDOA         | 445 | 48167 | 79 | 3990255,299 | 4501548,768 | 1,12813553 | 0,70500691 |
| 385 | A0A4W2ICU0 | Four and a half LIM domains 1                                             | FHL1          | 309 | 35024 | 6  | 27564,95733 | 46484,27623 | 1,68635401 | 0,23424915 |
| 386 | A0A4W2ICW9 | Profilin                                                                  | PFN3          | 137 | 14629 | 14 | 3274036,161 | 2975354,303 | 0,90877258 | 0,49619781 |
| 387 | A0A4W2IDE6 | UBC core domain-containing protein                                        |               | 147 | 16673 | 1  | 38717,41573 | 17746,46893 | 0,45835882 | 0,03864029 |
| 388 | A0A4W2IEM6 | Dynein light chain                                                        | DNAL4         | 134 | 14634 | 2  | 281297,8258 | 297627,0311 | 1,05804953 | 0,40209482 |
| 389 | A0A4W2IEV4 | Transmembrane protein 14C                                                 | TMEM14C       | 114 | 11721 | 2  | 99354,4328  | 96887,9022  | 0,97517443 | 0,87965741 |
| 390 | A0A4W2IFA5 | Succinate dehydrogenase [ubiquinone] iron-sulfur subunit, mitochondr      | SDHB          | 285 | 31993 | 8  | 2203263,148 | 2056821,299 | 0,93353411 | 0,78733223 |
| 391 | A0A4W2II32 | Tudor domain-containing protein 3                                         | TDRD3         | 736 | 82237 | 1  | 2531108,733 | 2592115,598 | 1,02410282 | 0,80519105 |
| 392 | A0A4W2II81 | Transmembrane protein 65                                                  | TMEM65        | 236 | 25041 | 1  | 146884,1174 | 167012,8665 | 1,1370383  | 0,40772514 |
| 393 | A0A4W2IIC9 | T-complex-associated-testis-expressed 1                                   | TCTE1         | 502 | 55376 | 1  | 34237,69415 | 22481,93079 | 0,65664267 | 0,08758891 |
| 394 | A0A4W2IJI3 | Disintegrin and metalloproteinase domain-containing protein 20-like       | LOC113897899  | 723 | 82091 | 22 | 363648,0547 | 453400,263  | 1,24681064 | 0,58178222 |
| 395 | A0A4W2IK05 | Coiled-coil domain containing 114                                         | CCDC114       | 797 | 89300 | 3  | 44899,24747 | 56767,38634 | 1,26432824 | 0,20068854 |
| 396 | A0A4W2IKF1 | Glutamine synthetase (EC 6.3.1.2)                                         | GLUL          | 373 | 42031 | 26 | 5076089,387 | 4959929,928 | 0,97711635 | 0,76481645 |
| 397 | A0A4W2IKL9 | 3-hydroxybutyrate dehydrogenase 1                                         | BDH1          | 344 | 38391 | 7  | 660835,3082 | 608275,5519 | 0,92046467 | 0,50993416 |
| 398 | A0A4W2IKP9 | tRNA-dihydrouridine synthase (EC 1.3.1.-)                                 | BCAP29        | 369 | 42809 | 2  | 31609,23263 | 26493,95525 | 0,83817142 | 0,80223886 |
| 399 | A0A4W2IL98 | Synaptophysin like 1                                                      | SYPL1         | 297 | 32290 | 3  | 624421,2493 | 413842,3749 | 0,66276152 | 0,1329668  |
| 400 | A0A4W2ILV6 | Pyruvate kinase (EC 2.7.1.40)                                             | PKM           | 655 | 71874 | 42 | 26334,08836 | 34981,48679 | 1,3283728  | 0,23716097 |
| 401 | A0A4W2IMA0 | Succinate--CoA ligase [GDP-forming] subunit beta, mitochondrial (EC 6.    | SUCLG2        | 432 | 46663 | 39 | 458700,5621 | 476385,4179 | 1,03855425 | 0,72287096 |
| 402 | A0A4W2IMG1 | Keratin associated protein 6-2                                            | KRTAP6-2      | 69  | 7021  | 1  | 1550985,912 | 6616,764033 | 0,00426617 | 0,41775683 |
| 403 | A0A4W2IPA3 | BPI fold containing family A member 1                                     | BPIFA1        | 306 | 32258 | 1  | 44095,43205 | 62815,75062 | 1,42454099 | 0,63550486 |
| 404 | A0A4W2IQG1 | Keratin 24                                                                | KRT24         | 525 | 55115 | 5  | 107833,4785 | 68631,82071 | 0,63646116 | 0,49545004 |
| 405 | A0A4W2IQJ0 | Family with sequence similarity 81 member B                               | FAM81B        | 445 | 51475 | 5  | 111488,6788 | 83195,93257 | 0,74622763 | 0,3941872  |
| 406 | A0A4W2IR05 | Outer dynein arm-docking complex subunit 4 (Tetratricopeptide repeat      | ODAD4 TTC25   | 683 | 78354 | 10 | 367767,8303 | 153815,2267 | 0,41824003 | 0,00920154 |
| 407 | A0A4W2IRM1 | Cilia- and flagella-associated protein 206                                | CFAP206       | 582 | 66645 | 3  | 14672,98852 | 21130,58547 | 1,440101   | 0,26373714 |
| 408 | A0A4W2IRRO | Malate dehydrogenase 1B                                                   | MDH1B         | 526 | 59163 | 1  | 17099,59018 | 22352,83877 | 1,30721488 | 0,54682693 |
| 409 | A0A4W2ITX2 | NADH dehydrogenase [ubiquinone] 1 beta subcomplex subunit 3 (Com          | NDUFB3        | 179 | 20284 | 1  | 124369,7025 | 147377,1575 | 1,18499244 | 0,42263116 |
| 410 | A0JN77     | Triokinase/FMN cyclase (EC 4.6.1.15) (Bifunctional ATP-dependent dihy     | TKFC DAK      | 578 | 59160 | 1  | 28727,91614 | 20014,12725 | 0,6966787  | 0,1093267  |
| 411 | A1A4J9     | DnaJ (Hsp40) homolog, subfamily A, member 3 (DnaJ heat shock protei       | DNAJA3        | 453 | 49254 | 6  | 200080,9584 | 225498,4099 | 1,12703583 | 0,3182514  |
| 412 | A1A4K9     | Succinyl-CoA:3-ketoacid-coenzyme A transferase (EC 2.8.3.5)               | OXCT2         | 517 | 56009 | 3  | 18981,5385  | 40992,48912 | 2,15959782 | 0,49949545 |
| 413 | A1A4P8     | Family with sequence similarity 209, member A (LOC784495 protein)         | LOC784495 FAM | 168 | 19359 | 9  | 448081,3792 | 602449,3836 | 1,34450886 | 0,05352008 |
| 414 | A2VDL2     | Solute carrier family 2, facilitated glucose transporter member 3 (GLUT   | SLC2A3        | 494 | 54119 | 15 | 4466920,943 | 4989288,887 | 1,11694139 | 0,49009688 |
| 415 | A2VDZ0     | Serine/threonine-protein phosphatase 2A 56 kDa regulatory subunit         | PPP2R5A       | 489 | 56526 | 1  | 19632,33029 | 25139,6083  | 1,28052085 | 0,20961978 |
| 416 | A4FV36     | Spermatogenesis-associated protein 20                                     | SPATA20       | 789 | 88360 | 5  | 154345,1501 | 153477,6302 | 0,99437935 | 0,87857147 |
| 417 | A4IFP2     | KRT4 protein (Keratin 4)                                                  | KRT4          | 549 | 58046 | 12 | 252563,8614 | 105156,4967 | 0,41635607 | 0,23588848 |
| 418 | A5D7S5     | SLC25A35 protein (Solute carrier family 25 member 35)                     | SLC25A35      | 311 | 33688 | 2  | 56304,93656 | 55637,23037 | 0,98814125 | 0,95865144 |
| 419 | A5D954     | Solute carrier family 25 (Mitochondrial carrier; oxoglutarate carrier), m | SLC25A11      | 311 | 33899 | 3  | 225766,8954 | 205768,625  | 0,91142071 | 0,55546989 |
| 420 | A5D973     | Alpha isoform of regulatory subunit A, protein phosphatase 2 (Protein f   | PPP2R1A       | 589 | 65282 | 1  | 28083,27198 | 15851,12879 | 0,56443312 | 0,49614471 |
| 421 | A5D9E7     | Mitochondrial trifunctional protein, beta subunit                         | HADHB         | 496 | 53704 | 17 | 2776889,516 | 2566960,845 | 0,9244015  | 0,56066612 |
| 422 | A5D9G3     | Succinate-CoA ligase subunit beta (EC 6.2.1.-)                            | LOC283398     | 432 | 46664 | 38 | 70925,70138 | 62734,64122 | 0,8845121  | 0,31038666 |
| 423 | A5PJ81     | LACTB protein (Lactamase beta)                                            | LACTB         | 556 | 61653 | 3  | 93290,95823 | 83349,46559 | 0,89343563 | 0,43530025 |
| 424 | A5PJA6     | Stomatin (EPB72)-like 2 (Stomatin like 2)                                 | STOML2        | 356 | 38733 | 2  | 18502,30425 | 28316,22639 | 1,53041621 | 0,80920325 |
| 425 | A5PID4     | KLKBL4 protein (Serine protease 54)                                       | PRSS54 KLKBL4 | 327 | 36921 | 3  | 322757,6035 | 356240,6623 | 1,10374057 | 0,59211666 |
| 426 | A5PK71     | Parkin coregulated gene protein                                           | PACRG         | 257 | 29284 | 15 | 2535602,457 | 2212393,82  | 0,87253182 | 0,22448333 |
| 427 | A5PKG4     | cysteine desulfurase (EC 2.8.1.7)                                         | NFS1          | 457 | 50344 | 3  | 34739,15368 | 32139,54287 | 0,9251677  | 0,8914297  |

|     |        |                                                                                  |              |      |        |     |             |             |            |            |
|-----|--------|----------------------------------------------------------------------------------|--------------|------|--------|-----|-------------|-------------|------------|------------|
| 428 | A5PKH9 | POC1 centriolar protein B (WDR51B protein)                                       | POC1B WDR51B | 478  | 53723  | 5   | 46278,73783 | 40148,47608 | 0,86753611 | 0,42660974 |
| 429 | A6H746 | C12H13ORF26 protein                                                              | C12H13ORF26  | 290  | 33737  | 1   | 113997,4481 | 119527,1736 | 1,04850745 | 0,88029867 |
| 430 | A6H758 | C11H9ORF9 protein                                                                | C11H9ORF9    | 223  | 25006  | 23  | 3862369,947 | 3848334,391 | 0,99636608 | 0,83410104 |
| 431 | A6H782 | Tektin-3                                                                         | TEKT3 OMC45  | 490  | 56681  | 45  | 9665,114645 | 26588,08245 | 2,75093296 | 0,56544628 |
| 432 | A6QLB8 | [tau protein] kinase (EC 2.7.11.26)                                              | GSK3A        | 495  | 52263  | 6   | 59368,99908 | 51741,02711 | 0,87151591 | 0,84634585 |
| 433 | A6QLG3 | Protein-serine/threonine kinase (EC 2.7.11.-)                                    | PDK3         | 415  | 47913  | 1   | 132536,7613 | 124030,5567 | 0,93582004 | 0,6378087  |
| 434 | A6QLL2 | MTX2 protein (Metaxin 2)                                                         | MTX2         | 264  | 29679  | 3   | 148140,3698 | 176186,0317 | 1,18931816 | 0,18234541 |
| 435 | A6QNM9 | SLC25A12 protein (Solute carrier family 25 member 12)                            | SLC25A12     | 675  | 74530  | 8   | 270930,3771 | 183648,8255 | 0,67784509 | 0,06319588 |
| 436 | A6QNX2 | DPP7 protein (Dipeptidyl peptidase 7)                                            | DPP7         | 488  | 53642  | 6   | 532552,2874 | 709168,5015 | 1,33164108 | 0,08822087 |
| 437 | A6QNZ7 | Keratin 10 (Keratin 10 (Epidermolytic hyperkeratosis; keratosis palmari; KRT10   |              | 526  | 54849  | 13  | 343857,2742 | 553006,6917 | 1,60824485 | 0,2589725  |
| 438 | A6QPG6 | LANCL2 protein (LanC like 2)                                                     | LANCL2       | 433  | 49166  | 6   | 226580,9259 | 245644,2418 | 1,08413469 | 0,51059983 |
| 439 | A6QQ54 | Phosphate carrier protein, mitochondrial (Phosphate transport protein, LOC616319 |              | 330  | 36606  | 13  | 2482869,956 | 2217021,103 | 0,89292679 | 0,56434098 |
| 440 | A6QQK5 | MMAA protein                                                                     | MMAA         | 421  | 46687  | 1   | 27818,66923 | 26964,57414 | 0,96929777 | 0,72449954 |
| 441 | A7E3P5 | 15-oxoprostaglandin 13-reductase (EC 1.3.1.48) (15-oxoprostaglandin 12ADH1       |              | 296  | 32091  | 2   | 62253,00139 | 56850,48794 | 0,91321682 | 0,48379974 |
| 442 | A7E3Q2 | Heat shock 70kDa protein 1A (Heat shock protein family A (Hsp70) menHSPA2        |              | 636  | 69809  | 22  | 1719488,311 | 1342163,892 | 0,78056006 | 0,11538186 |
| 443 | A7MB90 | non-specific serine/threonine protein kinase (EC 2.7.11.1)                       | CSNK1G2      | 414  | 47268  | 3   | 94120,48965 | 114894,4855 | 1,22071704 | 0,47948802 |
| 444 | A7MBF3 | STYXL1 protein (Serine/threonine/tyrosine interacting like 1)                    | STYXL1       | 309  | 35367  | 1   | 30568,59115 | 29999,09353 | 0,98136984 | 0,76844445 |
| 445 | A7Z057 | Tyrosine 3-monooxygenase/tryptophan 5-monooxygenase activation p YWHAG           |              | 247  | 28303  | 2   | 19200,08045 | 56094,96554 | 2,92160055 | 0,05755201 |
| 446 | B2KJ42 | fructose-bisphosphatase (EC 3.1.3.11)                                            |              | 338  | 36740  | 13  | 245499,524  | 204929,6872 | 0,83474576 | 0,21942459 |
| 447 | B5B3R8 | Alpha-S1-casein                                                                  | CSN1S1       | 214  | 24443  | 1   | 9921,915224 | 9768,800862 | 0,98456806 | 0,58553199 |
| 448 | C9QNT9 | TEPP protein (Testis, prostate and placenta expressed)                           | TEPP         | 216  | 24905  | 14  | 1808523,446 | 1821042,35  | 1,00692217 | 0,93181813 |
| 449 | D5K1R5 | Sperm protamine P1                                                               | PRM1         | 51   | 6713   | 1   | 21186,74417 | 81647,49013 | 3,85370633 | 0,03667663 |
| 450 | E1B6Z7 | Metabolism of cobalamin associated B                                             | MMAB         | 241  | 26615  | 4   | 162288,1834 | 176994,1498 | 1,09061637 | 0,52110762 |
| 451 | E1B7Q2 | Adenylate kinase 7                                                               | AK7          | 724  | 83016  | 4   | 170158,0597 | 176985,3326 | 1,04012312 | 0,706883   |
| 452 | E1B7S8 | Acrosin-binding protein (Acrosin-binding protein, 60 kDa form) (Proacr           | ACRBP        | 542  | 61273  | 118 | 59668232,96 | 67621903,48 | 1,13329824 | 0,33093893 |
| 453 | E1B7X2 | Actin like 11                                                                    | ACTL11       | 1204 | 129465 | 112 | 824523,5024 | 1020570,223 | 1,23776972 | 0,28647721 |
| 454 | E1B836 | Enkurin                                                                          | ENKUR        | 259  | 30157  | 8   | 131990,2623 | 126178,1864 | 0,95596587 | 0,98951086 |
| 455 | E1B844 | Mitochondrial import inner membrane translocase subunit TIM44                    | TIMM44       | 459  | 52004  | 2   | 29158,5881  | 16300,72265 | 0,55903676 | 0,04924022 |
| 456 | E1B8N5 | Sodium/potassium-transporting ATPase subunit alpha                               | ATP1A4       | 1030 | 113734 | 27  | 1180079,024 | 1077068,699 | 0,91270896 | 0,33075609 |
| 457 | E1B8R6 | RBR-type E3 ubiquitin transferase (EC 2.3.2.31)                                  | ARIH2        | 491  | 57517  | 3   | 58175,36632 | 54693,47384 | 0,94014834 | 0,54370639 |
| 458 | E1B8W3 | Outer dynein arm-docking complex subunit 2 (Armadillo repeat-contair             | ODAD2 ARMC4  | 1044 | 115859 | 12  | 217852,778  | 236725,3659 | 1,08663001 | 0,51493002 |
| 459 | E1B958 | ALMS1 centrosome and basal body associated protein                               | ALMS1        | 4331 | 482210 | 5   | 120544,8567 | 180052,7967 | 1,49365806 | 0,014907   |
| 460 | E1B993 | Ankyrin repeat and EF-hand domain containing 1                                   | ANKEF1       | 776  | 86915  | 1   | 38083,76913 | 31047,98004 | 0,81525492 | 0,30860516 |
| 461 | E1B9F6 | Elongation factor 1-alpha                                                        |              | 440  | 48049  | 3   | 332831,2605 | 247811,4126 | 0,7445557  | 0,13452446 |
| 462 | E1B9R5 | Dynein axonemal heavy chain 8                                                    | DNAH8        | 4730 | 541255 | 74  | 2138741,401 | 2109762,644 | 0,98645056 | 0,88313812 |
| 463 | E1B9Y3 | Lipocalin 12                                                                     | LCN12        | 193  | 21636  | 2   | 48023,68178 | 41493,63417 | 0,86402443 | 0,91669801 |
| 464 | E1BA21 | Transcription factor A, mitochondrial                                            | TFAM         | 246  | 28830  | 7   | 1379275,037 | 1027561,662 | 0,74500128 | 0,12973855 |
| 465 | E1BA36 | Sperm associated antigen 17                                                      | SPAG17       | 2229 | 252206 | 1   | 72731,99504 | 61567,99257 | 0,84650493 | 0,3214035  |
| 466 | E1BAJ3 | Coiled-coil domain containing 40                                                 | CCDC40       | 1125 | 129259 | 4   | 125886,8799 | 169323,4082 | 1,34504412 | 0,15285281 |
| 467 | E1BBC4 | Dynamin-like 120 kDa protein, mitochondrial (EC 3.6.5.5)                         | OPA1         | 1015 | 117520 | 2   | 28121,46999 | 49159,57184 | 1,7481153  | 0,09049913 |
| 468 | E1BC58 | RAB2B, member RAS onco family                                                    | RAB2B        | 216  | 24167  | 36  | 3555425,42  | 3831453,11  | 1,07763563 | 0,54990024 |
| 469 | E1BCC9 | Small nuclear ribonucleoprotein Sm D1 (snRNP core protein D1)                    | SNRPD1       | 134  | 14689  | 1   | 14690,43543 | 7874,474377 | 0,5360273  | 0,03793087 |
| 470 | E1BCN8 | Phosphoethanolamine/phosphocholine phosphatase 1                                 | PHOSPHO1     | 267  | 29687  | 5   | 220456,2193 | 226305,9656 | 1,02653473 | 0,91999922 |
| 471 | E1BCW3 | ATP-dependent 6-phosphofructokinase (ATP-PFK) (Phosphofructokinase               | PFKP         | 960  | 102968 | 10  | 69643,72569 | 95645,61422 | 1,37335579 | 0,42054935 |
| 472 | E1BD64 | Mitochondrial pyruvate carrier                                                   | MPC2         | 127  | 14282  | 1   | 92345,3563  | 63408,01656 | 0,68664001 | 0,16564852 |
| 473 | E1BD83 | Proteasome subunit alpha type                                                    | PSMA8        | 250  | 27915  | 6   | 503997,0409 | 441261,7363 | 0,87552446 | 0,36289911 |
| 474 | E1BDA8 | Izumo sperm-egg fusion 1                                                         | IZUMO1       | 322  | 36457  | 12  | 1832962,796 | 2183139,785 | 1,19104424 | 0,57033372 |
| 475 | E1BDM7 | Zinc finger MYND-type containing 12                                              | ZMYND12      | 366  | 41736  | 3   | 170335,9915 | 164335,1376 | 0,96477049 | 0,67407747 |

|     |        |                                                                         |               |      |        |     |             |             |            |            |
|-----|--------|-------------------------------------------------------------------------|---------------|------|--------|-----|-------------|-------------|------------|------------|
| 476 | E1BDQ6 | NME/NM23 family member 5                                                | NME5          | 209  | 23752  | 8   | 75335,78494 | 88005,5813  | 1,16817766 | 0,31973709 |
| 477 | E1BE64 | Testis specific 10                                                      | TSGA10        | 892  | 103566 | 87  | 4052489,748 | 4454761,887 | 1,09926543 | 0,4110469  |
| 478 | E1BED9 | Glutathione S-transferase omega (GSTO) (EC 1.20.4.2) (EC 1.8.5.1) (EC 2 | GSTO2         | 244  | 28261  | 29  | 12560734,34 | 11257874,31 | 0,89627517 | 0,45860603 |
| 479 | E1BEL9 | Coenzyme A synthase                                                     | COASY         | 562  | 61800  | 1   | 43158,59616 | 45689,33913 | 1,05863821 | 0,52303384 |
| 480 | E1BFM2 | Serine protease 50                                                      | PRSS50        | 418  | 45695  | 3   | 166000,7291 | 150339,5263 | 0,90565582 | 0,50742204 |
| 481 | E1BGD1 | Translocase of outer mitochondrial membrane 34                          | TOMM34        | 309  | 34743  | 2   | 42521,02523 | 33376,60389 | 0,78494354 | 0,30857589 |
| 482 | E1BHQ2 | Selenoprotein V                                                         | SELENOV       | 381  | 40603  | 1   | 13749,72711 | 9363,758291 | 0,68101412 | 0,29002918 |
| 483 | E1BHV9 | Ornithine decarboxylase antizyme 3                                      | OAZ3          | 117  | 13967  | 8   | 4062620,153 | 2774636,189 | 0,68296717 | 0,09988199 |
| 484 | E1BHW8 | UBX domain protein 11                                                   | UBXN11        | 475  | 53409  | 2   | 65482,87947 | 76804,60736 | 1,172896   | 0,3554212  |
| 485 | E1BI52 | Serine protease 42                                                      | PRSS42        | 337  | 36709  | 2   | 29436,63774 | 37492,75391 | 1,27367651 | 0,08987619 |
| 486 | E1BIN5 | Cullin 3                                                                | CUL3          | 768  | 88959  | 3   | 23511,29408 | 35687,29311 | 1,51787873 | 0,11245016 |
| 487 | E1BJB1 | Tubulin beta chain                                                      | TUBB2A        | 445  | 49907  | 153 | 17109,4613  | 22800,01288 | 1,33259677 | 0,56143795 |
| 488 | E1BJG2 | Radial spoke head 6 homolog A                                           | RSPH6A        | 704  | 79769  | 19  | 1544604,831 | 1583668,929 | 1,02529067 | 0,78378898 |
| 489 | E1BJG7 | Chromosome 15 C11orf42 homolog                                          | C15H11orf42   | 333  | 36540  | 2   | 5248,917357 | 4170,540577 | 0,79455253 | 0,60974929 |
| 490 | E1BJL9 | Cilia- and flagella- associated protein 210                             | CFAP210 CCDC1 | 547  | 65300  | 4   | 51608,62122 | 32876,08041 | 0,63702691 | 0,01009472 |
| 491 | E1BJW4 | Cilia and flagella associated protein 69                                | CFAP69        | 941  | 106186 | 1   | 37773,06709 | 19191,90555 | 0,50808438 | 0,11490161 |
| 492 | E1BJX2 | glutathione transferase (EC 2.5.1.18)                                   | GSTT4         | 241  | 28076  | 3   | 25274,1854  | 17223,39518 | 0,68146193 | 0,29564858 |
| 493 | E1BKF9 | Cilia- and flagella-associated protein 52                               | CFAP52        | 623  | 68637  | 6   | 290931,2519 | 310632,5079 | 1,06771791 | 0,65733678 |
| 494 | E1BLB4 | Dynein axonemal heavy chain 17                                          | DNAH17        | 4453 | 508122 | 81  | 11101,85208 | 10787,56953 | 0,97169098 | 0,76673857 |
| 495 | E1BLI3 | Ubiquitin-like protease family profile domain-containing protein        |               | 221  | 25106  | 3   | 7265,085643 | 5057,571504 | 0,69614754 | 0,15472165 |
| 496 | E1BM93 | Retinol dehydrogenase 11                                                | RDH11         | 340  | 37807  | 9   | 322945,08   | 296824,7496 | 0,91911835 | 0,47735093 |
| 497 | E1BMD1 | Cilia and flagella associated protein 43                                | CFAP43        | 1665 | 192505 | 6   | 110543,1515 | 101840,5762 | 0,92127441 | 0,6031596  |
| 498 | E1BMQ6 | Calcium-transporting ATPase (EC 7.2.2.10)                               | ATP2A3        | 999  | 109321 | 1   | 25538,55471 | 39259,67778 | 1,53727093 | 0,67741096 |
| 499 | E1BN01 | Dynein axonemal light intermediate chain 1                              | DNALI1        | 258  | 29672  | 17  | 1320709,118 | 1518416,275 | 1,14969773 | 0,3899278  |
| 500 | E1BNA2 | X-prolyl aminopeptidase 3                                               | XPNPEP3       | 507  | 57320  | 6   | 224499,8966 | 201355,2775 | 0,89690588 | 0,52889471 |
| 501 | E1BNL3 | Zonadhesin                                                              | ZAN           | 2459 | 269080 | 98  | 6805369,921 | 9474820,175 | 1,39225645 | 0,22706703 |
| 502 | E1BNS6 | Sperm-associated antigen 8                                              | SPAG8         | 484  | 51542  | 7   | 39642,68448 | 28883,02691 | 0,72858403 | 0,16941917 |
| 503 | E1BNS9 | L-lactate dehydrogenase (EC 1.1.1.27)                                   | LDHC          | 332  | 36015  | 63  | 20891229,76 | 20307645,49 | 0,97206559 | 0,81033816 |
| 504 | E1BP40 | Cilia and flagella associated protein 61                                | CFAP61        | 1236 | 141136 | 5   | 16201,32358 | 16543,09754 | 1,02109543 | 0,72459038 |
| 505 | E1BPM9 | Dynein axonemal intermediate chain 2                                    | DNAI2         | 616  | 70120  | 5   | 645593,9013 | 616315,1098 | 0,95464828 | 0,63018184 |
| 506 | E1BPT0 | Leucine rich repeats and death domain containing 1                      | LRRD1         | 863  | 98513  | 4   | 21463,87254 | 19139,41868 | 0,89170389 | 0,52811076 |
| 507 | E1BPV0 | Armadillo repeat containing 3                                           | ARMC3         | 871  | 95801  | 6   | 245669,5579 | 283880,0632 | 1,15553618 | 0,23024886 |
| 508 | E1BPY2 | Equatorin                                                               | EQTN          | 133  | 15118  | 2   | 9084,024636 | 32462,25773 | 3,57355457 | 0,00016896 |
| 509 | F1MAU4 | Prolylcarboxypeptidase                                                  | PRCP          | 499  | 56627  | 5   | 767105,7344 | 929748,1491 | 1,21202086 | 0,24607456 |
| 510 | F1MB31 | Peptidase S1 domain-containing protein                                  | PRSS46P       | 303  | 33731  | 2   | 40222,98547 | 30724,63159 | 0,76385756 | 0,23589091 |
| 511 | F1MBE1 | Threonine synthase like 1                                               | THNSL1        | 748  | 83738  | 2   | 13737,40066 | 15584,69966 | 1,13447224 | 0,76124087 |
| 512 | F1MBL6 | non-specific serine/threonine protein kinase (EC 2.7.11.1)              | SMG1          | 3658 | 410232 | 1   | 1930778,299 | 2158031,468 | 1,11770029 | 0,45342462 |
| 513 | F1MBQ1 | Serine/threonine-protein phosphatase with EF-hands (EC 3.1.3.16)        | PPEF1         | 658  | 75965  | 9   | 590955,5451 | 568508,4311 | 0,96201556 | 0,75420224 |
| 514 | F1MBS4 | Solute carrier family 25 member 10                                      | SLC25A10      | 287  | 31521  | 1   | 36876,57923 | 18215,74197 | 0,49396507 | 0,02986606 |
| 515 | F1MBU8 | Dpy-19 like 2                                                           | DPY19L2       | 773  | 89528  | 29  | 4594356,154 | 3895034,976 | 0,8477869  | 0,24707581 |
| 516 | F1MBV2 | ribose-phosphate diphosphokinase (EC 2.7.6.1)                           | PRPS1L1       | 329  | 35658  | 2   | 154582,0142 | 93904,76967 | 0,60747539 | 0,0658402  |
| 517 | F1MBZ1 | Kelch like family member 10                                             | KLHL10        | 608  | 68916  | 2   | 72763,88418 | 55270,67282 | 0,75958937 | 0,35220851 |
| 518 | F1MC11 | Keratin 14                                                              | KRT14         | 515  | 55895  | 10  | 19007,77332 | 60469,83675 | 3,18132144 | 0,25136738 |
| 519 | F1MDK8 | ADP/ATP translocase (ADP,ATP carrier protein)                           | SLC25A31      | 323  | 35654  | 43  | 1102647,551 | 1931280,132 | 1,7514936  | 0,3702196  |
| 520 | F1ME97 | 5-oxoprolinase, ATP-hydrolysing                                         | OPLAH         | 1210 | 128826 | 5   | 62382,46605 | 40109,44739 | 0,64296027 | 0,02382874 |
| 521 | F1MEI0 | Fibrous sheath CABYR binding protein                                    | FSCB          | 818  | 87746  | 12  | 45468,98165 | 59061,33333 | 1,2989368  | 0,23646168 |
| 522 | F1MEM9 | Tetratricopeptide repeat domain 19                                      | TTC19         | 268  | 30417  | 3   | 115136,0082 | 106914,5782 | 0,92859376 | 0,85052783 |
| 523 | F1MES6 | UBX domain protein 6                                                    | UBXN6         | 441  | 49806  | 3   | 44198,86178 | 26189,01717 | 0,59252696 | 0,01965288 |

|     |        |                                                                               |                |      |        |     |             |             |            |            |
|-----|--------|-------------------------------------------------------------------------------|----------------|------|--------|-----|-------------|-------------|------------|------------|
| 524 | F1MEX9 | Acyl-CoA synthetase long chain family member 3                                | ACSL3          | 720  | 80282  | 2   | 58495,89026 | 44260,16706 | 0,75663721 | 0,5263447  |
| 525 | F1MEY2 | Mitochondrial trans-2-enoyl-CoA reductase                                     | MECR           | 388  | 41759  | 5   | 37639,65006 | 42249,39854 | 1,12247055 | 0,51394242 |
| 526 | F1MFA3 | Pitriylsin metalloproteinase 1                                                | PITRM1         | 1032 | 116381 | 8   | 406436,9823 | 374303,8744 | 0,92093951 | 0,84229082 |
| 527 | F1MFB3 | Gem-associated protein 6                                                      | GEMIN6         | 588  | 68130  | 3   | 352048,1475 | 301475,5179 | 0,85634741 | 0,50227938 |
| 528 | F1MFR7 | Solute carrier family 9 member B1                                             | SLC9B1         | 513  | 55287  | 3   | 11390,0755  | 7167,17388  | 0,62924727 | 0,10071534 |
| 529 | F1MGCO | Succinate--CoA ligase [ADP-forming] subunit beta, mitochondrial (EC 6. SUCLA2 |                | 463  | 50146  | 6   | 445100,9761 | 498196,8115 | 1,11928942 | 0,43914164 |
| 530 | F1MGQ1 | Deoxyribonuclease                                                             | DNASE1L3       | 305  | 34936  | 13  | 575078,0238 | 300623,0708 | 0,5227518  | 0,12390523 |
| 531 | F1MGY9 | Aspartylglucosaminidase                                                       | AGA            | 346  | 36965  | 20  | 788054,8447 | 1103107,243 | 1,39978486 | 0,04703222 |
| 532 | F1MH21 | Membrane metalloendopeptidase like 1                                          | MMEL1          | 779  | 88991  | 2   | 168294,183  | 184269,9734 | 1,09492776 | 0,61975318 |
| 533 | F1MHK9 | ABC transporter domain-containing protein                                     | ABCA14 LOC524: | 1656 | 188419 | 10  | 297199,8661 | 316993,6742 | 1,066601   | 0,84932894 |
| 534 | F1MI43 | Sperm surface protein Sp17 (Sperm autoantigenic protein 17)                   | SPA17          | 147  | 16960  | 8   | 195788,7367 | 300995,4103 | 1,53734794 | 0,00583448 |
| 535 | F1MIC3 | [tau protein] kinase (EC 2.7.11.26)                                           | GSK3B          | 492  | 55067  | 4   | 30337,86959 | 28276,92725 | 0,93206701 | 0,73968853 |
| 536 | F1MIH2 | Septin                                                                        | SEPTIN7        | 417  | 48669  | 7   | 68177,33829 | 70149,01032 | 1,02891976 | 0,92819865 |
| 537 | F1MIH9 | Phospholipase B-like (EC 3.1.1.-)                                             | PLBD2          | 589  | 65723  | 3   | 298331,4412 | 410231,7766 | 1,3750873  | 0,27207814 |
| 538 | F1MIM1 | Prostate and testis expressed 2                                               |                | 113  | 13259  | 1   | 202145,8003 | 149187,6325 | 0,73801995 | 0,33398848 |
| 539 | F1MJ55 | Casein kinase 2 alpha 2                                                       | CSNK2A2        | 350  | 41171  | 6   | 203617,3016 | 176981,526  | 0,86918707 | 0,35400431 |
| 540 | F1MJ59 | Nitrilase family member 2                                                     | NIT2           | 283  | 31159  | 1   | 46622,46257 | 51858,71425 | 1,11231178 | 0,39972499 |
| 541 | F1MIQ7 | Fibronectin type III domain containing 8                                      | FNDC8          | 321  | 35343  | 41  | 908821,3137 | 987310,3741 | 1,08636358 | 0,76614056 |
| 542 | F1MJS8 | A-kinase anchoring protein 3                                                  | AKAP3          | 858  | 94740  | 154 | 19972416,45 | 18193486,01 | 0,91093064 | 0,40816762 |
| 543 | F1MIY8 | Immunity related GTPase cinema (Interferon-gamma-inducible GTPase             | IRGC IFGGE     | 465  | 50697  | 9   | 2052168,887 | 1614208,819 | 0,78658673 | 0,30629786 |
| 544 | F1MK41 | Short chain dehydrogenase/reductase family 39U member 1                       | SDR39U1        | 294  | 31306  | 3   | 48767,03214 | 42313,68413 | 0,86766986 | 0,49832309 |
| 545 | F1MK55 | Dynein axonemal heavy chain 2                                                 | DNAH2          | 4424 | 508289 | 14  | 417141,038  | 414731,4605 | 0,99422359 | 0,94681603 |
| 546 | F1MKF8 | Sulfide quinone oxidoreductase                                                | SQOR           | 450  | 49856  | 20  | 1034871,323 | 901961,0955 | 0,87156835 | 0,70133043 |
| 547 | F1MLB8 | ATP synthase subunit alpha                                                    | ATP5F1A        | 553  | 59690  | 92  | 206025,6278 | 194328,1989 | 0,94322343 | 0,96284643 |
| 548 | F1MLM6 | ITPRIP like 1                                                                 | ITPRIPL1       | 547  | 62607  | 2   | 47742,15041 | 45342,1208  | 0,94972934 | 0,79037703 |
| 549 | F1MLS7 | Membrane spanning 4-domains A13                                               | MS4A13         | 176  | 19737  | 1   | 42484,92215 | 51784,14152 | 1,21888282 | 0,31767331 |
| 550 | F1MM32 | Sulfhydryl oxidase (EC 1.8.3.2)                                               | QSOX1          | 608  | 67021  | 7   | 159799,0101 | 184259,9882 | 1,1530734  | 0,5284842  |
| 551 | F1MMV1 | EF-hand domain-containing family member B (Cilia- and flagella-associ         | EFHB CFAP21    | 877  | 97819  | 10  | 198092,5787 | 216704,7947 | 1,09395716 | 0,53822638 |
| 552 | F1MMZ2 | Ferritin                                                                      | FTMT           | 242  | 27396  | 12  | 458402,3199 | 488192,5668 | 1,06498712 | 0,73935717 |
| 553 | F1MN23 | Dehydrogenase/reductase 7B                                                    | DHRS7B         | 325  | 35104  | 2   | 24813,65252 | 23234,2601  | 0,93634986 | 0,78876685 |
| 554 | F1MNH2 | Radial spoke head component 1                                                 | RSPH1          | 308  | 34964  | 7   | 143418,7587 | 131333,6433 | 0,91573546 | 0,35768935 |
| 555 | F1MNL6 | Nucleoporin 210 like                                                          | NUP210L        | 1884 | 209653 | 8   | 247873,7841 | 281212,9    | 1,13450037 | 0,52666532 |
| 556 | F1MNT1 | Nucleoporin 155                                                               | NUP155         | 1367 | 152487 | 7   | 411602,5579 | 481385,1332 | 1,16953873 | 0,74917286 |
| 557 | F1MP86 | Tetraspanin                                                                   | TSPAN8         | 238  | 26208  | 8   | 366352,8089 | 475375,7989 | 1,29759016 | 0,0634285  |
| 558 | F1MPF5 | Sperm acrosome developmental regulator                                        | SPACDR         | 200  | 22379  | 13  | 1486745,521 | 2336286,622 | 1,57140989 | 0,48986028 |
| 559 | F1MPK4 | 3-hydroxyisobutyryl-CoA hydrolase (HIB-CoA hydrolase) (HIBYL-CoA-H)           | HIBCH          | 386  | 43478  | 2   | 6505,329451 | 11950,53579 | 1,83703775 | 0,23234811 |
| 560 | F1MQE8 | Synaptotjanin 2 binding protein                                               | SYNJ2BP        | 145  | 15826  | 1   | 21664,14631 | 22561,45426 | 1,04141903 | 0,71276643 |
| 561 | F1MQJ0 | Angiotensin-converting enzyme (ACE) (EC 3.4.15.1) (Dipeptidyl carboxy         | ACE DCP1       | 1306 | 150097 | 13  | 2404971,063 | 1256105,577 | 0,52229551 | 0,03501373 |
| 562 | F1MQX0 | Acetyl-coenzyme A synthetase (EC 6.2.1.1)                                     | ACSS1          | 675  | 74294  | 22  | 45921,16773 | 56978,03203 | 1,24077925 | 0,24210205 |
| 563 | F1MR35 | Angiotensin-converting enzyme (EC 3.4.-.-)                                    | ACE3           | 747  | 86747  | 12  | 1837362,008 | 2047014,566 | 1,1141052  | 0,44289698 |
| 564 | F1MR53 | Coiled-coil domain containing 27                                              |                | 305  | 36069  | 3   | 53417,14561 | 69769,40793 | 1,30612385 | 0,16457814 |
| 565 | F1MRQ2 | Chromosome 3 C1orf185 homolog                                                 | C3H1orf185     | 208  | 23881  | 2   | 13976,10944 | 41966,51191 | 3,00273206 | 0,00181165 |
| 566 | F1MS25 | NADH dehydrogenase [ubiquinone] iron-sulfur protein 3, mitochondria           | NDUFS3         | 266  | 30240  | 17  | 1094060,53  | 1019920,317 | 0,9322339  | 0,5277261  |
| 567 | F1MSR1 | Protease, serine, 45                                                          | PRSS45         | 316  | 35251  | 1   | 35385,49675 | 29160,95026 | 0,82409328 | 0,96381146 |
| 568 | F1MSV5 | glycerol kinase (EC 2.7.1.30)                                                 | GK2            | 554  | 60868  | 41  | 2156441,412 | 2501608,98  | 1,1600635  | 0,22589713 |
| 569 | F1MUB8 | Spermatosis and centriole associated 1                                        | SPATC1         | 415  | 44819  | 11  | 3940614,76  | 4300357,274 | 1,09129096 | 0,52685216 |
| 570 | F1MUV1 | fatty acid amide hydrolase (EC 3.5.1.99)                                      | FAAH           | 579  | 63025  | 7   | 616819,481  | 614089,4445 | 0,99557401 | 0,99010805 |
| 571 | F1MUZ9 | 60 kDa heat shock protein, mitochondrial (EC 5.6.1.7) (60 kDa chaperon        | HSPD1          | 573  | 60978  | 43  | 2995441,024 | 3253195,303 | 1,08604886 | 0,48924269 |

|     |        |                                                                      |              |      |        |     |             |             |            |            |
|-----|--------|----------------------------------------------------------------------|--------------|------|--------|-----|-------------|-------------|------------|------------|
| 572 | F1MVL2 | Acyl-CoA dehydrogenase short chain                                   | ACADS        | 412  | 44444  | 12  | 872398,1551 | 892140,2256 | 1,02262966 | 0,81463258 |
| 573 | F1MW14 | RAN guanine nucleotide release factor                                | RANGRF       | 186  | 20714  | 5   | 81955,15043 | 68150,40755 | 0,83155735 | 0,9593879  |
| 574 | F1MWD3 | T-complex protein 1 subunit epsilon (CCT-epsilon)                    | CCT5         | 541  | 59601  | 6   | 184370,9573 | 159019,3952 | 0,86249699 | 0,34988384 |
| 575 | F1MWF0 | Huntingtin interacting protein 1                                     | HIP1         | 1037 | 116494 | 4   | 101340,4659 | 81753,09428 | 0,80671717 | 0,39026805 |
| 576 | F1MWN8 | Cilia and flagella associated protein 58                             | CFAP58       | 867  | 103024 | 7   | 45335,98245 | 64618,14198 | 1,4253169  | 0,06673712 |
| 577 | F1MWR3 | Electron transfer flavoprotein subunit alpha (Alpha-ETF)             | ETFA         | 333  | 34957  | 16  | 8372,492999 | 7805,227631 | 0,93224654 | 0,68365587 |
| 578 | F1MWT0 | alpha-mannosidase (EC 3.2.1.24)                                      | MAN2C1       | 1040 | 115861 | 2   | 131569,3135 | 88975,29696 | 0,67626177 | 0,13416536 |
| 579 | F1MWX4 | Histone deacetylase 11                                               | HDAC11       | 385  | 42832  | 2   | 138875,8435 | 120850,4367 | 0,90270532 | 0,40321538 |
| 580 | F1MWY9 | Enoyl-CoA delta isomerase 2                                          | ECI2         | 393  | 42772  | 18  | 1038769,63  | 1137463,639 | 1,09501049 | 0,48334598 |
| 581 | F1MX05 | Saccharopine dehydrogenase (putative)                                | SCCPDH       | 429  | 47316  | 65  | 11072092,26 | 10345877,72 | 0,93441036 | 0,51504898 |
| 582 | F1MX68 | Carboxypeptidase (EC 3.4.16.-)                                       | CPVL         | 593  | 66281  | 13  | 1639578,299 | 2113223,205 | 1,28888215 | 0,07212281 |
| 583 | F1MX88 | Solute carrier family 25 member 13                                   | SLC25A13     | 642  | 70566  | 4   | 23758,18353 | 27255,49976 | 1,1472047  | 0,65417278 |
| 584 | F1MXX0 | MICOS complex subunit MIC60 (Mitofilin)                              | IMMT         | 749  | 83044  | 18  | 894713,7983 | 856099,3891 | 0,95684161 | 0,68258259 |
| 585 | F1MXX5 | Nardilysin convertase                                                | NRDC         | 1192 | 136076 | 3   | 85053,82248 | 78300,16068 | 0,92059543 | 0,48042499 |
| 586 | F1MXY8 | Solute carrier family 25 member 1                                    | SLC25A1      | 311  | 33780  | 7   | 790154,5416 | 759040,5067 | 0,96062285 | 0,76307569 |
| 587 | F1MY12 | NTR domain-containing protein                                        | LOC112442231 | 243  | 28493  | 1   | 17984,7915  | 17984,96172 | 1,00000946 | 0,8954317  |
| 588 | F1MY24 | Chaperonin containing TCP1 subunit 8 like 2                          | CCT8L2       | 534  | 56607  | 6   | 315398,6774 | 288535,0107 | 0,91482632 | 0,47049428 |
| 589 | F1MY32 | Lymphocyte antigen 6 complex locus protein G5c                       | LY6G5C       | 141  | 16190  | 3   | 29576,41874 | 152697,7766 | 5,16282171 | 0,13265623 |
| 590 | F1MY93 | Leucine rich repeat containing 34                                    | LRRC34       | 451  | 49618  | 1   | 47636,2539  | 58158,17272 | 1,22088048 | 0,17261042 |
| 591 | F1MYA6 | IZUMO family member 4                                                | IZUMO4       | 213  | 24375  | 30  | 10272374,94 | 10567245,34 | 1,02870518 | 0,88745941 |
| 592 | F1MYE8 | Acyl-CoA dehydrogenase family member 9                               | ACAD9        | 594  | 65165  | 18  | 733978,5243 | 679448,2063 | 0,92570584 | 0,58122889 |
| 593 | F1MYG0 | Ornithine aminotransferase (EC 2.6.1.13)                             | OAT          | 439  | 48118  | 9   | 141775,8996 | 116860,7422 | 0,8242638  | 0,41584589 |
| 594 | F1MYH5 | A-kinase anchoring protein 4                                         | AKAP4        | 848  | 94002  | 690 | 75067438    | 54862309,23 | 0,7308403  | 0,45854333 |
| 595 | F1MZ38 | Succinate--CoA ligase [ADP/GDP-forming] subunit alpha, mitochondrial | SUCLG1       | 346  | 36139  | 14  | 1088311,328 | 1346730,485 | 1,23744966 | 0,0748984  |
| 596 | F1MZ78 | Leucine rich repeat and coiled-coil centrosomal protein 1            | LRRCC1       | 1027 | 118790 | 1   | 65289,07631 | 84924,32438 | 1,30074324 | 0,25273737 |
| 597 | F1MZB5 | Testis expressed 37                                                  | TEX37        | 180  | 20322  | 4   | 143807,5013 | 126578,3988 | 0,8801933  | 0,38403251 |
| 598 | F1MZD5 | Dehydrogenase/reductase (SDR family) member 4                        | DHRS4        | 279  | 29454  | 2   | 159095,5479 | 171635,5581 | 1,07882062 | 0,84045742 |
| 599 | F1MZG1 | Spermatosis associated 6                                             | SPATA6       | 488  | 56206  | 4   | 106482,9881 | 124062,6847 | 1,16509395 | 0,24373364 |
| 600 | F1MZJ1 | Tektin bundle interacting protein 1                                  | TEKTIP1      | 208  | 24526  | 9   | 713526,5526 | 630561,8771 | 0,88372588 | 0,39184687 |
| 601 | F1MZR7 | Spermatid maturation 1                                               | SPEM1        | 313  | 35314  | 4   | 96276,40284 | 67498,04739 | 0,7010861  | 0,17559328 |
| 602 | F1N058 | Rhophilin associated tail protein 1                                  | ROPN1        | 212  | 23978  | 64  | 17585345,08 | 16178962,46 | 0,9200253  | 0,58067916 |
| 603 | F1N124 | Leucine rich repeat containing 23                                    | LRRC23       | 342  | 39611  | 3   | 99232,77903 | 124859,7123 | 1,25825069 | 0,19042286 |
| 604 | F1N191 | Interleukin 4 induced 1                                              | IL4I1        | 578  | 64479  | 80  | 43958234,93 | 33756854,32 | 0,76793016 | 0,04344004 |
| 605 | F1N1E1 | Protein phosphatase 1 regulatory subunit 32                          | PPP1R32      | 428  | 47685  | 2   | 158810,837  | 170241,9235 | 1,07197926 | 0,96982092 |
| 606 | F1N1M7 | Carnitine palmitoyltransferase 2                                     | CPT2         | 658  | 74455  | 5   | 46482,30694 | 53368,08029 | 1,14813751 | 0,38393856 |
| 607 | F1N1W5 | Nitrilase 1                                                          | NIT1         | 328  | 36222  | 1   | 11514,90015 | 14288,73132 | 1,2408906  | 0,33861587 |
| 608 | F1N206 | Dihydropolyl dehydrogenase (EC 1.8.1.4)                              | DLD          | 509  | 54187  | 33  | 2080726,879 | 2258669,016 | 1,08551922 | 0,50479934 |
| 609 | F1N2F2 | Phosphoglycerate mutase (EC 5.4.2.11) (EC 5.4.2.4)                   | PGAM2        | 253  | 28699  | 12  | 558329,311  | 475425,0346 | 0,85151366 | 0,45515881 |
| 610 | F1N2S7 | Testis specific serine kinase 6                                      | TSSK6        | 273  | 30211  | 6   | 1296683,541 | 1034644,311 | 0,79791582 | 0,08388884 |
| 611 | F1N2V1 | Golgi associated RAB2 interactor family member 2                     | GARIN2       | 397  | 44273  | 7   | 675772,9818 | 687842,0876 | 1,0178597  | 0,98896829 |
| 612 | F1N310 | NADH-cytochrome b5 reductase (EC 1.6.2.2)                            | CYB5R2       | 273  | 30929  | 1   | 8397,015381 | 8238,948736 | 0,98117585 | 0,96780364 |
| 613 | F1N338 | Hydroxyacyl-CoA dehydrogenase                                        | HADH         | 314  | 34391  | 4   | 902728,9826 | 743206,1995 | 0,82328829 | 0,64787464 |
| 614 | F1N343 | Coiled-coil domain containing 136                                    | CCDC136      | 1201 | 138257 | 39  | 1396087,235 | 1449985,02  | 1,03860632 | 0,75053115 |
| 615 | F1N369 | Zona pellucida binding protein                                       | ZBPB         | 350  | 39484  | 55  | 39486739,09 | 49308894,92 | 1,24874568 | 0,14619799 |
| 616 | F1N3A8 | Chromosome 27 C4orf47 homolog                                        | C27H4orf47   | 309  | 34499  | 3   | 34577,77139 | 33026,4513  | 0,95513534 | 0,74579881 |
| 617 | F1N3F1 | LETM1 domain containing 1                                            | LETMD1       | 360  | 41929  | 1   | 48781,14514 | 34954,28189 | 0,71655312 | 0,20237909 |
| 618 | F1N3G6 | Phospholipid-transporting ATPase (EC 7.6.2.1)                        | ATP11C       | 1119 | 128315 | 3   | 23739,79678 | 43280,98587 | 1,82314054 | 0,17634876 |
| 619 | F1N3Q8 | MIER family member 2                                                 | MIER2        | 561  | 61272  | 1   | 304161,1856 | 205852,159  | 0,67678642 | 0,72142331 |

|     |         |                                                                              |               |      |        |     |             |             |            |            |
|-----|---------|------------------------------------------------------------------------------|---------------|------|--------|-----|-------------|-------------|------------|------------|
| 620 | F1N3R4  | Mitochondrial proton/calcium exchanger protein (Electroneutral mitoc         | LETM1         | 786  | 87860  | 6   | 109896,262  | 100486,3375 | 0,91437448 | 0,48235888 |
| 621 | F1N3X1  | IQ motif containing F5                                                       | LOC100125949  | 177  | 21626  | 2   | 128404,5641 | 132892,779  | 1,0349537  | 0,89622798 |
| 622 | F1N402  | Centrosomal protein of 44 kDa                                                | CEP44         | 385  | 43562  | 1   | 16116,60369 | 20456,33874 | 1,26927107 | 0,51678416 |
| 623 | F1N427  | Septin                                                                       | SEPTIN12      | 361  | 41134  | 8   | 126561,6621 | 128370,2224 | 1,01428995 | 0,99071883 |
| 624 | F1N4A1  | Armadillo repeat containing 12                                               | ARMC12        | 338  | 38134  | 22  | 3769314,928 | 4473022,082 | 1,18669365 | 0,19452205 |
| 625 | F1N4M3  | Pyruvate dehydrogenase phosphatase regulatory subunit                        | P DPR         | 878  | 98841  | 5   | 190012,0823 | 157490,8044 | 0,82884626 | 0,28024755 |
| 626 | F1N5C9  | Radial spoke head 10 homolog B (Chlamydomonas)                               | RSPH10B       | 871  | 99777  | 2   | 63747,25697 | 53566,23219 | 0,84029078 | 0,71721201 |
| 627 | F1N5R7  | Dynein axonemal heavy chain 7                                                | DNAH7         | 4024 | 461307 | 33  | 441213,6594 | 400333,5401 | 0,90734621 | 0,37605333 |
| 628 | F1N690  | Acetyltransferase component of pyruvate dehydrogenase complex (EC            | DLAT          | 647  | 69067  | 18  | 6315254,232 | 6186836,889 | 0,97966553 | 0,78684165 |
| 629 | F1N6A0  | Isochorismatase domain containing 2                                          | ISOC2         | 204  | 22388  | 11  | 419126,1468 | 373505,99   | 0,89115411 | 0,45917126 |
| 630 | F1N6I4  | NADP-dependent oxidoreductase domain-containing protein                      | LOC788425     | 334  | 36823  | 1   | 96022,96282 | 101214,01   | 1,05406048 | 0,52010138 |
| 631 | F1N6K8  | Uncharacterized protein                                                      | LOC789612     | 275  | 29927  | 18  | 2280723,999 | 2044302,348 | 0,89633921 | 0,58552587 |
| 632 | F1N6M5  | Coiled-coil domain containing 183                                            | CCDC183       | 534  | 62388  | 2   | 21747,92919 | 25209,16397 | 1,15915238 | 0,64243527 |
| 633 | F1N7K1  | Rhophilin associated tail protein 1 like                                     | ROPN1L        | 218  | 24422  | 10  | 1367231,516 | 1519041,112 | 1,11110343 | 0,36467843 |
| 634 | F1N7P3  | EF-hand domain-containing protein                                            |               | 495  | 55574  | 3   | 340532,6426 | 212745,0556 | 0,62474203 | 0,15955434 |
| 635 | F1N7X7  | Golgi associated RAB2B interactor family member 3                            | GARIN3        | 587  | 62663  | 35  | 2535832,944 | 2600168,821 | 1,02537071 | 0,7865151  |
| 636 | F2Z4D5  | RAB11A, member RAS onco family                                               | RAB11A        | 216  | 24394  | 1   | 31740,9423  | 35392,22832 | 1,11503395 | 0,7003536  |
| 637 | F6QGE6  | Acyl-CoA thioesterase 13                                                     | ACOT13        | 236  | 25627  | 3   | 46917,66636 | 46484,07746 | 0,99075852 | 0,79366612 |
| 638 | F6QJG7  | Zona pellucida binding protein 2                                             | ZPBP2         | 326  | 37409  | 13  | 353129,8483 | 350139,7237 | 0,99153251 | 0,86663171 |
| 639 | F6QQ46  | Chromosome 10 C15orf48 homolog                                               | C10H15orf48   | 110  | 12678  | 11  | 1952703,689 | 2251419,228 | 1,15297535 | 0,28103364 |
| 640 | F6R6Q1  | FAD synthase (EC 2.7.7.2) (FAD pyrophosphorylase) (FMN adenyltran:           | FLAD1         | 490  | 54273  | 2   | 59140,84766 | 46323,73757 | 0,78327821 | 0,18130959 |
| 641 | F6RFP6  | Basigin                                                                      | BSG           | 320  | 34897  | 5   | 381101,7164 | 477133,2841 | 1,25198409 | 0,2809914  |
| 642 | F6RJC2  | Cilia- and flagella-associated protein 161                                   | CFAP161       | 321  | 36470  | 7   | 412783,2998 | 452250,3437 | 1,09561202 | 0,50600253 |
| 643 | F6RP72  | Tubulin alpha chain                                                          | TUBA3E        | 458  | 50886  | 138 | 63157529,26 | 67435760,75 | 1,06773906 | 0,63574994 |
| 644 | G1K1H0  | ADAM metallopeptidase domain 2                                               | ADAM2         | 745  | 83127  | 37  | 567894,1581 | 722024,124  | 1,27140615 | 0,2477989  |
| 645 | G3MWWG4 | isoleucine--tRNA ligase (EC 6.1.1.5) (Isoleucyl-tRNA synthetase)             | IARS2         | 1012 | 113608 | 10  | 199649,1835 | 170129,6557 | 0,85214301 | 0,33621176 |
| 646 | G3MY76  | Cylicin 1                                                                    | CYLC1         | 655  | 73443  | 33  | 1584498,676 | 1,16211171  | 0,32366414 |            |
| 647 | G3MY97  | Golgi associated RAB2 interactor protein-like Rab2B-binding domain-co        |               | 794  | 87181  | 2   | 80616,06115 | 79219,52227 | 0,98267667 | 0,72144265 |
| 648 | G3MZ01  | Profilin                                                                     |               | 153  | 17049  | 1   | 77587,6946  | 116959,4866 | 1,50744892 | 0,10617161 |
| 649 | G3MZM7  | Uncharacterized protein                                                      |               | 520  | 55964  | 9   | 114523,3651 | 204635,046  | 1,78684102 | 0,01210013 |
| 650 | G3MZM8  | vitamin-K-epoxide reductase (warfarin-sensitive) (EC 1.17.4.4)               | VKORC1L1      | 176  | 19832  | 2   | 390918,5307 | 304731,8778 | 0,77952784 | 0,07694808 |
| 651 | G3MZS1  | Small integral membrane protein 13                                           | SMIM13 LOC112 | 87   | 9939   | 1   | 17459,97562 | 18539,10647 | 1,06180598 | 0,70529037 |
| 652 | G3MZX2  | Proline rich 30                                                              | PRR30         | 398  | 42785  | 9   | 32424,65517 | 41746,77752 | 1,28750105 | 0,20129387 |
| 653 | G3MZZ7  | Family with sequence similarity 170 member B                                 | FAM170B       | 289  | 32536  | 1   | 2809,838386 | 5431,257285 | 1,93294294 | 0,04261993 |
| 654 | G3N0F7  | Testis expressed 50                                                          | TEX50         | 179  | 20784  | 5   | 79435,00084 | 109639,3074 | 1,38023927 | 0,13195982 |
| 655 | G3NOV2  | Keratin, type II cytoskeletal 1 (Cytokeratin-1) (Keratin-1) (Type-II keratir | KRT1          | 606  | 63165  | 18  | 941304,4037 | 953502,8652 | 1,0129591  | 0,9833496  |
| 656 | G3N136  | Testis specific serine kinase 2                                              | TSSK2         | 358  | 40763  | 13  | 281817,1872 | 427829,0931 | 1,51810859 | 0,03302128 |
| 657 | G3N284  | Actin related protein T1                                                     | ACTRT1        | 377  | 42131  | 9   | 89179,53603 | 119401,4353 | 1,33888828 | 0,09026196 |
| 658 | G3N2D2  | Testis specific serine kinase 1B                                             | TSSK1B        | 367  | 41541  | 5   | 21236,25839 | 23356,43024 | 1,09983735 | 0,38081325 |
| 659 | G3N2I2  | Chromosome 11 C2orf81 homolog                                                | C11H2orf81    | 606  | 65873  | 1   | 34025,89231 | 40855,26122 | 1,20071094 | 0,71519883 |
| 660 | G3N3B6  | Coiled-coil domain containing 188                                            | CCDC188       | 497  | 53253  | 5   | 12855,87198 | 20300,15164 | 1,57905677 | 0,15872187 |
| 661 | G3X6A7  | Outer dense fiber of sperm tails 3                                           | ODF3          | 254  | 27643  | 11  | 1954468,149 | 2052613,552 | 1,05021591 | 0,85235161 |
| 662 | G3X6E2  | Family with sequence similarity 166 member A                                 | FAM166A       | 320  | 36204  | 32  | 2977767,015 | 3134063,122 | 1,05248769 | 0,60999753 |
| 663 | G3X7X2  | Solute carrier family 25 member 32                                           | SLC25A32      | 317  | 35618  | 3   | 285432,7434 | 308612,935  | 1,0812107  | 0,80589574 |
| 664 | G3X800  | Disintegrin and metalloproteinase domain-containing protein 20-like          |               | 724  | 82069  | 18  | 553765,1948 | 685259,3121 | 1,23745464 | 0,44941896 |
| 665 | G3X807  | Histone H4                                                                   | H4C9          | 98   | 10949  | 6   | 7348823,197 | 2930322,01  | 0,39874711 | 0,01103348 |
| 666 | G3X8G1  | ATP6V1F neighbor                                                             | ATP6V1FNB     | 176  | 20248  | 3   | 65292,84643 | 80119,44387 | 1,22707844 | 0,30483183 |
| 667 | G5E519  | Coiled-coil domain-containing protein 39                                     | CCDC39        | 941  | 109998 | 2   | 19211,95569 | 15389,4312  | 0,80103408 | 0,80636175 |



|     |        |                                                                                         |                 |      |        |    |             |             |            |            |
|-----|--------|-----------------------------------------------------------------------------------------|-----------------|------|--------|----|-------------|-------------|------------|------------|
| 668 | G5E521 | NAD-dependent protein deacetylase (EC 2.3.1.286)                                        | SIRT3           | 333  | 36992  | 7  | 390709,1227 | 370426,0888 | 0,94808661 | 0,58597938 |
| 669 | G5E531 | T-complex protein 1 subunit alpha (CCT-alpha)                                           | TCP1            | 556  | 60222  | 13 | 575426,3436 | 472141,4455 | 0,82050718 | 0,09645505 |
| 670 | G5E5C6 | Acrosin (EC 3.4.21.10)                                                                  | ACR             | 414  | 45494  | 64 | 70208831,17 | 81104700,42 | 1,15519229 | 0,25864038 |
| 671 | G5E6S5 | Coiled-coil domain containing 159                                                       | CCDC159         | 337  | 38411  | 5  | 142788,9657 | 182974,7128 | 1,28143454 | 0,13502928 |
| 672 | G8CY12 | Beta-defensin                                                                           |                 | 89   | 9374   | 5  | 60801,24334 | 110739,9307 | 1,82134319 | 0,00303262 |
| 673 | I6NUJ4 | Choline transporter-like protein                                                        | SLC44A5         | 717  | 81886  | 4  | 111362,3959 | 84785,77018 | 0,76135009 | 0,14819835 |
| 674 | M0QVZ6 | Keratin 5                                                                               | KRT5            | 594  | 62624  | 10 | 1124151,126 | 1393299,077 | 1,23942328 | 0,70557748 |
| 675 | M4MFL5 | Trypsin-like serine protease-like protein                                               |                 | 301  | 32668  | 1  | 31168,52761 | 23640,28229 | 0,75846644 | 0,43221724 |
| 676 | M5FHL5 | NADH dehydrogenase [ubiquinone] 1 beta subcomplex subunit 10 (ConNDUFB10 BOS_2          |                 | 176  | 20965  | 4  | 179313,6165 | 175377,2854 | 0,97804778 | 0,88773849 |
| 677 | M5FJY9 | Phosphoglycolate phosphatase (EC 3.1.3.18)                                              | PGP BOS_22504   | 321  | 34320  | 3  | 51506,57268 | 110544,9271 | 2,14622953 | 0,03430759 |
| 678 | M5FK65 | Protease, serine, 21-like                                                               | PRSS21 BOS_225  | 485  | 53800  | 1  | 16649,20544 | 17955,30087 | 1,07844791 | 0,51049215 |
| 679 | M5FK83 | CG2446-like                                                                             | LOC516108 BOS_  | 232  | 25065  | 2  | 142625,5514 | 185880,5305 | 1,30327651 | 0,13058666 |
| 680 | M5FKE0 | Tektin                                                                                  | TEKT4 BOS_2246  | 447  | 51945  | 41 | 48363,17628 | 46063,71395 | 0,95245427 | 0,64099626 |
| 681 | M5FMT6 | Hydroxyacylglutathione hydrolase, mitochondrial (EC 3.1.2.6)                            | HAGH BOS_2245   | 308  | 34089  | 5  | 14785,89717 | 16954,51697 | 1,14666812 | 0,67561489 |
| 682 | N0E4A8 | Casein kinase II subunit beta (Phosvitin)                                               | Csnk2b-Ly6g5b   | 233  | 26239  | 3  | 45163,40091 | 75536,08644 | 1,67250661 | 0,0932016  |
| 683 | O77779 | Fertilin alpha                                                                          | ADAM 1          | 812  | 89905  | 20 | 608296,1148 | 1028431,16  | 1,69067521 | 0,00546362 |
| 684 | P04394 | NADH dehydrogenase [ubiquinone] flavoprotein 2, mitochondrial (EC 7 NDUFV2              |                 | 249  | 27308  | 6  | 475153,7933 | 642133,7568 | 1,35142298 | 0,62844658 |
| 685 | P16368 | Metalloproteinase inhibitor 2 (Collagenase inhibitor) (Tissue inhibitor o TIMP2         |                 | 220  | 24355  | 3  | 281178,4456 | 211439,447  | 0,75197601 | 0,4340231  |
| 686 | P29392 | Spermadhesin-1 (Acidic seminal fluid protein) (ASFP)                                    | SPADH1          | 134  | 15036  | 4  | 134607,3108 | 148618,1421 | 1,1040867  | 0,78841529 |
| 687 | Q00361 | ATP synthase subunit e, mitochondrial (ATPase subunit e) (ATP synthas ATP5ME ATP5I      |                 | 71   | 8321   | 4  | 523589,2362 | 504747,2674 | 0,96401383 | 0,92061751 |
| 688 | Q02827 | NADH dehydrogenase [ubiquinone] 1 subunit C2 (Complex I-B14.5b) (C NDUFC2               |                 | 120  | 14096  | 2  | 789969,0503 | 854993,1332 | 1,08231219 | 0,53481741 |
| 689 | Q05AT5 | HIG1 domain family, member 2A (HIG1 hypoxia inducible domain famil' HIGD2A              |                 | 106  | 11575  | 1  | 21857,57129 | 26248,61161 | 1,20089333 | 0,54978989 |
| 690 | Q08DM3 | Malic enzyme                                                                            | ME2             | 584  | 65413  | 2  | 15784,26725 | 13306,28081 | 0,84300909 | 0,46370341 |
| 691 | Q08DN5 | Carnitine O-acetyltransferase (Carnitine acetyltransferase)                             | CRAT MGC14278   | 626  | 71017  | 14 | 544201,5513 | 534426,833  | 0,98203842 | 0,88407373 |
| 692 | Q0I149 | Dual specificity phosphatase 21 (Similar to Dual specificity protein phosDUSP21 LOC5381 |                 | 196  | 22052  | 6  | 160492,5368 | 179320,266  | 1,11731218 | 0,48066292 |
| 693 | Q0I1B9 | Uncharacterized protein LOC777692                                                       | LOC777692       | 106  | 12606  | 1  | 30726,58566 | 14145,02657 | 0,46035139 | 0,13119969 |
| 694 | Q0V8B1 | Protein Flattop (Cilia- and flagella-associated protein 126)                            | CFAP126 C1orf19 | 216  | 23381  | 1  | 71879,92957 | 94974,01473 | 1,32128698 | 0,24699116 |
| 695 | Q0VCS8 | glutathione transferase (EC 2.5.1.18)                                                   | GSTT3           | 239  | 27277  | 2  | 143534,8791 | 187513,3189 | 1,30639549 | 0,30828977 |
| 696 | Q0VCU3 | Cathepsin F                                                                             | CTSF            | 460  | 50893  | 17 | 10298980,78 | 13611835,81 | 1,32166824 | 0,04631286 |
| 697 | Q148D3 | Fumarate hydratase, mitochondrial (EC 4.2.1.2)                                          | FH              | 510  | 54691  | 30 | 2680883,355 | 2740018,872 | 1,02205822 | 0,85131699 |
| 698 | Q148I4 | Acyl-CoA thioesterase 7                                                                 | ACOT7           | 338  | 37368  | 2  | 98948,90804 | 79907,40881 | 0,80756231 | 0,18587974 |
| 699 | Q148J8 | Isocitrate dehydrogenase [NAD] subunit, mitochondrial                                   | IDH3A           | 366  | 39698  | 10 | 923868,973  | 968777,543  | 1,04860924 | 0,66023484 |
| 700 | Q148N0 | 2-oxoglutarate dehydrogenase complex component E1 (E1o) (OGDC-E1 OGDH                   |                 | 1023 | 115808 | 39 | 1257566,771 | 1573398,493 | 1,25114509 | 0,1249621  |
| 701 | Q17QF5 | Protein kinase cAMP-dependent type I regulatory subunit beta (ProteinPRKAR1B            |                 | 381  | 43032  | 4  | 81261,68114 | 87504,56861 | 1,07682449 | 0,7524437  |
| 702 | Q17QY3 | Nipsnap homolog 3A (C. elegans)                                                         | NIPSNAP3A       | 247  | 28540  | 1  | 7347,51802  | 8540,374822 | 1,16234826 | 0,99409224 |
| 703 | Q1JPA2 | Elongation factor 1-gamma (eEF-1B gamma)                                                | EEF1G           | 439  | 50231  | 4  | 205918,1524 | 110122,2921 | 0,53478671 | 0,06114674 |
| 704 | Q1JPF2 | NADH dehydrogenase (Ubiquinone) 1 alpha subcomplex, 9, 39kDa                            | NDUFA9          | 369  | 41660  | 12 | 1150940,647 | 1102599,409 | 0,9579985  | 0,66870292 |
| 705 | Q1LZ81 | PDCD6 protein (Programmed cell death 6)                                                 | PDCD6           | 189  | 21737  | 3  | 48434,45417 | 42258,82914 | 0,87249521 | 0,45476915 |
| 706 | Q1RMP3 | Spermatogenesis associated 3 (Spermatosis associated 3)                                 | SPATA3          | 230  | 24393  | 2  | 264189,3627 | 358266,4583 | 1,35609721 | 0,1247135  |
| 707 | Q1RMP3 | CutA divalent cation tolerance homolog (E. coli)                                        | CUTA            | 153  | 16347  | 4  | 118319,297  | 93112,75178 | 0,78696167 | 0,18677566 |
| 708 | Q24JZ7 | Succinyl-CoA:3-ketoacid-coenzyme A transferase (EC 2.8.3.5)                             | OXCT1           | 520  | 56453  | 15 | 575696,2684 | 629189,6504 | 1,09291945 | 0,45426668 |
| 709 | Q28092 | Cylicin-2 (Cylicin II) (Multiple-band polypeptide II)                                   | CYLC2 CYL2      | 488  | 53562  | 26 | 204498,6947 | 220442,2374 | 1,07796403 | 0,59938634 |
| 710 | Q29RT2 | Hypothetical LOC540061                                                                  | LOC540061       | 242  | 27071  | 2  | 14161,11854 | 26020,43358 | 1,8374561  | 0,28982512 |
| 711 | Q29RT3 | MS4A13 protein                                                                          | NYD-SP21        | 861  | 97385  | 3  | 41874,28747 | 46595,38243 | 1,11274448 | 0,51791004 |
| 712 | Q29RU5 | Rhabdoid tumor deletion region gene 1                                                   | RTDR1           | 379  | 41493  | 6  | 157481,0517 | 132237,3725 | 0,83970339 | 0,25333873 |
| 713 | Q2HJ11 | Succinate dehydrogenase [ubiquinone] flavoprotein subunit, mitochondri                  | SDHA            | 678  | 74407  | 35 | 2511838,674 | 3254633,401 | 1,29571753 | 0,15264883 |
| 714 | Q2KIC7 | Serine/threonine-protein phosphatase (EC 3.1.3.16)                                      | PPP6C           | 305  | 35144  | 5  | 54968,34602 | 32513,04298 | 0,59148665 | 0,09418213 |
| 715 | Q2KII5 | Histone H2B                                                                             | H2BC5 HIST1H2E  | 126  | 13936  | 5  | 5685283,227 | 1526045,591 | 0,26842033 | 0,02965578 |

|     |        |                                                                             |                 |     |       |     |             |             |            |            |
|-----|--------|-----------------------------------------------------------------------------|-----------------|-----|-------|-----|-------------|-------------|------------|------------|
| 716 | Q2KIK5 | LOC767871 protein                                                           | LOC767871       | 392 | 43229 | 7   | 132644,1284 | 163949,8903 | 1,23601318 | 0,2612949  |
| 717 | Q2KIV7 | inorganic diphosphatase (EC 3.6.1.1)                                        | PPA2            | 327 | 36963 | 3   | 20772,37272 | 14387,99795 | 0,69265067 | 0,27870464 |
| 718 | Q2KIV8 | Glutathione S-transferase (EC 2.5.1.18)                                     | GSTM3           | 225 | 26850 | 105 | 60121864,61 | 56657677,62 | 0,94238058 | 0,54945774 |
| 719 | Q2KIZ0 | TSBP protein                                                                | TSBP            | 573 | 62599 | 2   | 26952,59351 | 24843,73982 | 0,92175693 | 0,75718001 |
| 720 | Q2KJH9 | 4-trimethylaminobutyraldehyde dehydrogenase (TMABA-DH) (TMABA[ALDH9A1       |                 | 494 | 53977 | 5   | 313819,2532 | 284700,1649 | 0,90721064 | 0,66759205 |
| 721 | Q2NKS5 | Chromosome 22 C3orf84 homolog (Uncharacterized protein MGC13701             | C22H3orf84 MGC1 | 204 | 23462 | 3   | 155221,6695 | 174369,4407 | 1,12335759 | 0,44788848 |
| 722 | Q2NKS8 | peptidylprolyl isomerase (EC 5.2.1.8)                                       | LOC526524       | 108 | 11945 | 3   | 95169,28294 | 100347,4622 | 1,0544102  | 0,6489797  |
| 723 | Q2NKT6 | Uncharacterized protein MGC137036                                           | MGC137036       | 112 | 12953 | 1   | 53651,82309 | 42991,96053 | 0,80131407 | 0,7343498  |
| 724 | Q2NKZ3 | ADAM metallopeptidase domain 32                                             | ADAM32          | 747 | 82546 | 22  | 8494384,2   | 10420177,5  | 1,2267137  | 0,22307392 |
| 725 | Q2NKZ8 | glycerol kinase (EC 2.7.1.30)                                               | LOC538702       | 553 | 60602 | 43  | 9951232,871 | 9506304,284 | 0,9552891  | 0,69317218 |
| 726 | Q2NL07 | Farnesyl pyrophosphate synthase ((2E,6E)-farnesyl diphosphate syntha        | FDPS            | 421 | 48333 | 11  | 45663,48825 | 31148,3042  | 0,68212713 | 0,15968556 |
| 727 | Q2T9Y3 | Pyruvate dehydrogenase E1 component subunit alpha (EC 1.2.4.1)              | PDHA2           | 391 | 43292 | 22  | 950440,8629 | 1302376,796 | 1,37028704 | 0,06593439 |
| 728 | Q2TA15 | Chromosome 15 open reading frame 23 ortholog (Kinetochore localizer         | KNSTRN C10H15   | 234 | 25676 | 1   | 37563,49824 | 43325,67275 | 1,15339824 | 0,88075926 |
| 729 | Q2TA22 | Long-chain-fatty-acid--CoA ligase (EC 6.2.1.15) (EC 6.2.1.3) (Acyl-CoA sy   | ACSL6           | 697 | 78043 | 15  | 696620,7581 | 531733,291  | 0,76330383 | 0,05648963 |
| 730 | Q2TA28 | Signal-regulatory protein delta                                             | SIRPD           | 286 | 31467 | 7   | 179703,4234 | 245900,5494 | 1,36836875 | 0,09623644 |
| 731 | Q2TA33 | Membrane cofactor protein                                                   | LOC616002       | 397 | 45796 | 8   | 307977,6303 | 373317,0349 | 1,21215633 | 0,37699091 |
| 732 | Q2TBH3 | Actin related protein M1 (Actin related protein T3)                         | ACTRT3 ARPM1    | 368 | 40943 | 26  | 4110372,157 | 4258714,798 | 1,03608983 | 0,79290588 |
| 733 | Q2TBP9 | Coilin                                                                      | COIL            | 571 | 63122 | 3   | 73816,91455 | 79996,15096 | 1,0837103  | 0,54067459 |
| 734 | Q2TBR1 | 5'-nucleotidase, cytosolic IB                                               | NT5C1B          | 564 | 64011 | 90  | 4087811,175 | 4397359,974 | 1,07572483 | 0,71347186 |
| 735 | Q2TBS5 | Serine peptidase inhibitor, Kazal type 2 (Acrosin-trypsin inhibitor) (Serir | SPINK2B SPINK2  | 84  | 9391  | 3   | 357170,716  | 715065,8866 | 2,00202831 | 0,09522712 |
| 736 | Q2TBW4 | Polycystic kidney disease 2-like 2 (Polycystin 2 like 2, transient receptor | PKD2L2          | 600 | 71610 | 1   | 45709,15155 | 48569,25503 | 1,06257179 | 0,99184768 |
| 737 | Q2YDK3 | Hyaluronidase (EC 3.2.1.35)                                                 | SPAM1           | 553 | 62299 | 49  | 13558901,45 | 15101405,78 | 1,11376322 | 0,5323296  |
| 738 | Q2YDK7 | Thioredoxin domain containing 3 (Spermatzoa)                                | TXNDC3          | 410 | 46919 | 7   | 231403,4081 | 250426,4706 | 1,08220736 | 0,42017896 |
| 739 | Q2YDL8 | Uncharacterized protein LOC780846                                           | LOC780846       | 243 | 27324 | 7   | 149434,7079 | 126327,6539 | 0,84537023 | 0,98140476 |
| 740 | Q2YDN8 | Inactive serine/threonine-protein kinase VRK3 (Serine/threonine-prote       | VRK3            | 451 | 50549 | 15  | 2328092,259 | 2371979,586 | 1,0188512  | 0,83441031 |
| 741 | Q2YDP2 | Sad1 and UNC84 domain containing 5 (Sperm associated antigen 4-like),SUN5   | SPAG4L          | 372 | 42629 | 8   | 11659,00038 | 12250,81276 | 1,05076013 | 0,71060116 |
| 742 | Q32KP0 | Spermatid-specific manchette-related protein 1 (Ciliated bronchial epit     | SMRP1 CBE1      | 304 | 35066 | 37  | 3130000,783 | 2077357,668 | 0,66369238 | 0,34312026 |
| 743 | Q32KP4 | Abhydrolase domain containing 16B (Chromosome 20 open reading fra           | ABHD16B C13H2   | 470 | 52624 | 4   | 444116,2039 | 335432,2034 | 0,75528026 | 0,04443936 |
| 744 | Q32KP8 | Serine peptidase inhibitor-like, with Kunitz and WAP domains 1 (Eppin)      | SPINLW1         | 134 | 15093 | 2   | 68170,43159 | 32619,37481 | 0,47849741 | 0,09912688 |
| 745 | Q32KR0 | TBC1 domain family, member 21                                               | TBC1D21         | 299 | 34883 | 1   | 32670,28211 | 15293,96486 | 0,46813079 | 0,00675641 |
| 746 | Q32KR2 | Acrosomal vesicle protein 1                                                 | ACRV1           | 273 | 28953 | 26  | 348619,3419 | 339539,2866 | 0,97395424 | 0,81717866 |
| 747 | Q32KR7 | Hypothetical LOC539526                                                      | LOC539526       | 477 | 54623 | 20  | 710987,188  | 840834,881  | 1,18263014 | 0,35639334 |
| 748 | Q32KS3 | F-actin-capping protein subunit alpha                                       | CAPZA3          | 299 | 35066 | 67  | 17588876,91 | 19649060,44 | 1,11712991 | 0,52253531 |
| 749 | Q32L04 | Late cornified envelope-like proline-rich protein 1                         | LELP1           | 110 | 11767 | 11  | 76879,04789 | 150618,4139 | 1,95916076 | 0,00263338 |
| 750 | Q32L54 | Sperm associated antigen 6                                                  | SPAG6           | 509 | 55443 | 24  | 1929561,268 | 1707127,721 | 0,88472325 | 0,25677625 |
| 751 | Q32L61 | Calcium binding tyrosine phosphorylation regulated (Calcium binding t       | CABYR           | 454 | 48564 | 29  | 1262442,185 | 1154331,145 | 0,91436357 | 0,63491607 |
| 752 | Q32L64 | Similar to Dnal (Hsp40) homolog, subfamily B, member 3                      | LOC528549       | 244 | 26915 | 9   | 203683,888  | 170752,4529 | 0,83832086 | 0,36605105 |
| 753 | Q32L74 | Aquaporin 7                                                                 | AQP7            | 330 | 35948 | 7   | 689542,9133 | 708731,4075 | 1,02782785 | 0,79477052 |
| 754 | Q32L87 | DDB1 and CUL4 associated factor 7 (WD repeat domain 68)                     | DCAF7 WDR68     | 342 | 38926 | 1   | 25954,42967 | 32100,85965 | 1,23681622 | 0,32987008 |
| 755 | Q32LB7 | V-type proton ATPase subunit E 2 (V-ATPase subunit E 2) (Vacuolar pro       | ATP6V1E2        | 226 | 26171 | 3   | 192019,3583 | 144080,8506 | 0,75034544 | 0,14744666 |
| 756 | Q32LI7 | Testis expressed 33 (Uncharacterized protein MGC133880)                     | TEX33 MGC1338   | 272 | 30275 | 1   | 6363,414511 | 11139,19649 | 1,75050619 | 0,29146961 |
| 757 | Q32LN4 | Cilia- and flagella-associated protein 45                                   | CFAP45 CCDC19   | 549 | 65666 | 6   | 176545,2512 | 236435,4402 | 1,33923421 | 0,06950622 |
| 758 | Q32LN6 | Protein SPATA31F3 (Protein FAM205C)                                         | SPATA31F3 FAM   | 408 | 45146 | 27  | 4500310,283 | 4577455,605 | 1,01714222 | 0,94182811 |
| 759 | Q32LP8 | Cysteine-rich secretory protein 2                                           | CRISP2          | 244 | 27143 | 6   | 74273,0965  | 111885,0465 | 1,50640073 | 0,07534665 |
| 760 | Q32P61 | Histone H2A                                                                 | H2AL1Q LOC5231  | 117 | 13150 | 11  | 216335,06   | 431177,6457 | 1,9931011  | 0,00319239 |
| 761 | Q32PA1 | CD59 molecule (CD59 molecule, complement regulatory protein)                | CD59            | 121 | 13663 | 2   | 52188,95779 | 47967,0979  | 0,91910435 | 0,97135024 |
| 762 | Q32S21 | FabG-like protein (Hydroxysteroid (17-beta) dehydrogenase 8) (Hydrox        | HSD17B8 FABGL   | 259 | 26468 | 3   | 154862,0144 | 142035,4237 | 0,91717407 | 0,47228279 |
| 763 | Q3MHX0 | sulfite oxidase (EC 1.8.3.1)                                                | SUOX            | 547 | 60501 | 8   | 570363,6397 | 634662,7813 | 1,11273359 | 0,97929205 |

|     |         |                                                                          |                 |      |        |    |             |             |            |            |
|-----|---------|--------------------------------------------------------------------------|-----------------|------|--------|----|-------------|-------------|------------|------------|
| 764 | Q3SWX2  | Acyl-coenzyme A thioesterase 9, mitochondrial (Acyl-CoA thioesterase     | ACOT9           | 437  | 49853  | 15 | 317211,5745 | 294451,77   | 0,9282504  | 0,53274181 |
| 765 | Q3SZ00  | enoyl-CoA hydratase (EC 4.2.1.17)                                        | HADHA           | 763  | 83249  | 24 | 4115373,187 | 3698308,522 | 0,8986569  | 0,36371648 |
| 766 | Q3SZ15  | Eukaryotic translation elongation factor 1 epsilon 1                     | EEF1E1          | 174  | 19757  | 2  | 88089,51466 | 62396,97043 | 0,70833595 | 0,17600935 |
| 767 | Q3SZA4  | Solute carrier family 25 (Carnitine/acylcarnitine translocase), member 2 | SLC25A20        | 301  | 32928  | 2  | 173929,5444 | 156737,7513 | 0,90115657 | 0,91470155 |
| 768 | Q3SZK3  | Growth hormone inducible transmembrane protein                           | GHITM           | 345  | 37029  | 4  | 330734,7818 | 352814,1864 | 1,06675864 | 0,66311328 |
| 769 | Q3SZT4  | Testis-expressed protein 29                                              | TEX29           | 147  | 16331  | 9  | 114473,9312 | 148708,1289 | 1,29905671 | 0,07794344 |
| 770 | Q3SZW9  | DnaJ (Hsp40) related, subfamily B, member 13 (DnaJ heat shock protein    | DNAJB13         | 316  | 36077  | 13 | 896627,7212 | 917948,3346 | 1,02377867 | 0,77521249 |
| 771 | Q3SZX1  | Cytochrome c oxidase subunit 7B2, mitochondrial (MGC127695 protein       | MGC127695 COX   | 78   | 8983   | 1  | 27702,16878 | 44661,28964 | 1,6121947  | 0,43079536 |
| 772 | Q3T010  | Phosphatidylethanolamine-binding protein 4                               | PEBP4           | 223  | 25146  | 15 | 1530282,599 | 1816646,446 | 1,18713135 | 0,49187462 |
| 773 | Q3T034  | Serine rich single-pass membrane protein 1 (Uncharacterized protein      | VSSMEM1 MGC12   | 241  | 27622  | 5  | 8710,770403 | 17351,4713  | 1,99195599 | 0,00253596 |
| 774 | Q3T056  | L-lactate dehydrogenase A-like 6B (EC 1.1.1.27)                          | LDHAL6B         | 381  | 41592  | 27 | 9415377,732 | 11412686,67 | 1,21213264 | 0,16943379 |
| 775 | Q3T0U3  | Es1 protein (Glutamine amidotransferase class 1 domain containing 3)     | ES1 GATD3       | 274  | 28699  | 6  | 348889,3126 | 401390,3401 | 1,15048047 | 0,51548864 |
| 776 | Q3T0Z0  | WAP four-disulfide core domain 2                                         | WFDC2           | 123  | 12729  | 2  | 44021,72213 | 29810,61187 | 0,67717959 | 0,19816685 |
| 777 | Q3T172  | ECH1 protein                                                             | ECH1            | 347  | 37572  | 3  | 102231,0992 | 1,14885279  | 0,51347879 |            |
| 778 | Q3ZBG1  | Ras-related protein Rab-14                                               | RAB14           | 215  | 23897  | 3  | 18450,69594 | 29648,31269 | 1,606894   | 0,29596947 |
| 779 | Q3ZBY4  | Fructose-bisphosphate aldolase (EC 4.1.2.13)                             | ALDOC           | 364  | 39382  | 21 | 32561,89181 | 83455,88333 | 2,56299246 | 0,01910574 |
| 780 | Q4R0H2  | Spermadhesin 2                                                           | spadh2 SPADH2   | 134  | 15221  | 4  | 263806,7552 | 170953,9033 | 0,64802701 | 0,07927892 |
| 781 | Q58D70  | Serine/threonine-protein phosphatase (EC 3.1.3.16)                       | PPP2CA          | 309  | 35580  | 1  | 10430,81783 | 8750,728939 | 0,83893028 | 0,25324408 |
| 782 | Q58DM0  | Isocitrate dehydrogenase [NAD] subunit, mitochondrial                    | IDH3G           | 392  | 42873  | 5  | 656874,9655 | 476879,7529 | 0,72598254 | 0,02445196 |
| 783 | Q5E974  | Deoxyguanosine kinase isoform a                                          | DGUOK           | 277  | 32043  | 3  | 52574,66881 | 40091,54107 | 0,76256383 | 0,65106991 |
| 784 | Q5RZ69  | Sperm mitochondria-associated cysteine-rich protein                      | SMCP            | 103  | 10977  | 4  | 30573,54222 | 51955,97715 | 1,69937709 | 0,12242877 |
| 785 | Q7JAT1  | ATP synthase subunit a                                                   | ATP6 atp6 ATPas | 226  | 24788  | 1  | 8886,580513 | 6048,965241 | 0,68068536 | 0,0852094  |
| 786 | Q7JAT2  | ATP synthase protein 8                                                   | ATP8 atp8 ATPas | 66   | 7937   | 3  | 92826,16146 | 111763,5757 | 1,20400945 | 0,17444057 |
| 787 | Q862J3  | V-type proton ATPase subunit D (V-type proton ATPase subunit d) (Vac     |                 | 165  | 18391  | 1  | 11293,54956 | 14806,7821  | 1,31108311 | 0,18296844 |
| 788 | Q862K7  | Dynein light chain                                                       |                 | 78   | 9252   | 24 | 1756246,665 | 1291651,114 | 0,73546111 | 0,23371645 |
| 789 | Q8HZY1  | Serine protease inhibitor clade E member 2 (Serine protease inhibitor-   | ESERPINE2       | 397  | 43877  | 5  | 168736,3716 | 127812,5076 | 0,75746863 | 0,22541858 |
| 790 | Q8M444  | Cytochrome c oxidase subunit 2                                           | COX2            | 227  | 26020  | 24 | 1865299,623 | 2160408,286 | 1,15820979 | 0,28296273 |
| 791 | Q9N273  | Kappa-casein                                                             | CSN3            | 160  | 17879  | 1  | 16910,25899 | 15167,1773  | 0,89692164 | 0,82099294 |
| 792 | Q9N2J2  | Phospholipid hydroperoxide glutathione peroxidase (PHGPx) (EC 1.11.1     | GPX4            | 197  | 22240  | 82 | 133405312,2 | 142378444,1 | 1,06726218 | 0,56601998 |
| 793 | Q9XSJ4  | Alpha-enolase (EC 4.2.1.11) (2-phospho-D-glycerate hydro-lyase) (Enol    | ENO1            | 434  | 47326  | 53 | 9040832,556 | 11146672,59 | 1,23292545 | 0,22134477 |
| 794 | U3GR08  | NADH-ubiquinone oxidoreductase chain 4 (EC 7.1.1.2)                      | ND4             | 459  | 52113  | 2  | 9227,945155 | 6747,490729 | 0,73120187 | 0,63438698 |
| 795 | U3GU87  | Cytochrome c oxidase subunit 1 (EC 7.1.1.9)                              | COX1            | 514  | 57062  | 1  | 65098,04796 | 57047,49287 | 0,87633185 | 0,25506102 |
| 796 | U3GXK6  | Cytochrome c oxidase subunit 3                                           | COX3            | 260  | 29876  | 2  | 45925,3674  | 50647,20105 | 1,10281537 | 0,47376425 |
| 797 | U3GXM3  | NADH-ubiquinone oxidoreductase chain 1 (EC 7.1.1.2)                      | ND1             | 318  | 35710  | 1  | 15529,14995 | 23779,26588 | 1,53126642 | 0,1442694  |
| 798 | V6F7X8  | Oligoribonuclease, mitochondrial                                         | REXO2 BOS_143   | 237  | 26885  | 1  | 23090,70873 | 12611,60813 | 0,54617674 | 0,03329023 |
| 799 | V6F959  | ATP synthase subunit                                                     | ATP5L BOS_143   | 104  | 11621  | 6  | 1710541,143 | 1786144,832 | 1,0441987  | 0,85817615 |
| 800 | V9VJQ3  | Sperm flagella 2 protein (Sperm flagellar 2)                             | SPEF2           | 1713 | 196868 | 1  | 30328,06173 | 25032,72117 | 0,82539799 | 0,26565193 |
| 801 | W0UUV03 | Ribonuclease A C1                                                        | RAC1            | 150  | 16377  | 13 | 79150,668   | 77857,62984 | 0,98366359 | 0,80690483 |
| 802 | W0UUVF3 | Ribonuclease A M1                                                        | RAM1            | 146  | 17714  | 4  | 349020,1182 | 227205,881  | 0,65098219 | 0,25251651 |
